# Supplementary material
Source: HighWire-hosted journal article supplement (https://jitc.bmj.com/content/11/4/e005967)
Supplement: inline-supplementary-material-2 [file inline-supplementary-material-2.pdf]

Supplementary Table 1

| Therapy              | Study title                                                                                                                                                                                                                                                      | Chemotherapy | Radiation therapy | Clinical trials identifier                                                                            |
|----------------------|------------------------------------------------------------------------------------------------------------------------------------------------------------------------------------------------------------------------------------------------------------------|--------------|-------------------|-------------------------------------------------------------------------------------------------------|
| Checkpoint inhibitor | 18F-FDG PET/CT to Evaluate pD-1 Monoclonal Antibody Combined With First-line Chemotherapy in Advanced Non-small Cell Lung Cancer                                                                                                                                 | Y            |                   | <a href="https://ClinicalTrials.gov/show/NCT04996927">https://ClinicalTrials.gov/show/NCT04996927</a> |
| Checkpoint inhibitor | A Clinical Study Evaluating Nivolumab-containing Treatments in Patients With Advanced Non-small Cell Lung Cancer After Failing Previous PD-1/L1 Therapy and Chemotherapy                                                                                         | Y            |                   | <a href="https://ClinicalTrials.gov/show/NCT04151563">https://ClinicalTrials.gov/show/NCT04151563</a> |
| Checkpoint inhibitor | A Clinical Study of HLX10 Combined With Chemotherapy Versus Placebo Combined With Chemotherapy for Neoadjuvant/Adjuvant Treatment of Gastric Cancer                                                                                                              | Y            |                   | <a href="https://ClinicalTrials.gov/show/NCT04139135">https://ClinicalTrials.gov/show/NCT04139135</a> |
| Checkpoint inhibitor | A Clinical Study to Evaluate Efficacy and Safety of HLX10 Combined With Albumin-Bound Paclitaxel in Patients With Advanced Cervical Cancer Who Have Progressive Disease or Intolerable Toxicity After First-Line Standard Chemotherapy                           | Y            |                   | <a href="https://ClinicalTrials.gov/show/NCT04150575">https://ClinicalTrials.gov/show/NCT04150575</a> |
| Checkpoint inhibitor | A Clinical Study to Evaluate Efficacy and Safety of HLX10 Combined With HLX04 and Chemotherapy (XELOX) in Patients With Metastatic Colorectal Cancer (mCRC)                                                                                                      | Y            |                   | <a href="https://ClinicalTrials.gov/show/NCT04547166">https://ClinicalTrials.gov/show/NCT04547166</a> |
| Checkpoint inhibitor | A Clinical Trial Comparing HLX10 With Placebo Combined With Chemotherapy (Cisplatin + 5-fu) in the First-line Treatment of Locally Advanced/Metastatic Esophageal Squamous Cell Carcinoma (ESCC)                                                                 | Y            |                   | <a href="https://ClinicalTrials.gov/show/NCT03958890">https://ClinicalTrials.gov/show/NCT03958890</a> |
| Checkpoint inhibitor | A Global Study to Assess the Effects of MEDI4736 Following Concurrent Chemoradiation in Patients With Stage III Unresectable Non-Small Cell Lung Cancer                                                                                                          | Y            | Y                 | <a href="https://ClinicalTrials.gov/show/NCT02125461">https://ClinicalTrials.gov/show/NCT02125461</a> |
| Checkpoint inhibitor | A Multicenter Phase II Trial of Post-operative Concurrent Chemoradiotherapy Using Weekly Cisplatin With Tiselimab for Patients With High-risk Head and Neck Squamous Cell Carcinoma the POTENTIAL Study                                                          | Y            |                   | <a href="https://ClinicalTrials.gov/show/NCT04814069">https://ClinicalTrials.gov/show/NCT04814069</a> |
| Checkpoint inhibitor | A Multicenter, Phase 3, Randomized Trial of Sequential Chemoradiotherapy With or Without Toripalimab (PD-1 Antibody) in Newly Diagnosed Early-Stage Extranodal Natural Killer/T Cell Lymphoma, Nasal Type (ENKTL)                                                | Y            |                   | <a href="https://ClinicalTrials.gov/show/NCT04365036">https://ClinicalTrials.gov/show/NCT04365036</a> |
| Checkpoint inhibitor | A Phase Ib/II Study of AK104 and AK117 in Combination With or Without Chemotherapy in Advanced Malignant Tumors                                                                                                                                                  | Y            |                   | <a href="https://ClinicalTrials.gov/show/NCT05235542">https://ClinicalTrials.gov/show/NCT05235542</a> |
| Checkpoint inhibitor | A Phase II Study of SHR-1210 vs Placebo as Consolidation Chemotherapy After Radical Concurrent Chemoradiotherapy in Locally Advanced ESCC                                                                                                                        | Y            |                   | <a href="https://ClinicalTrials.gov/show/NCT03817658">https://ClinicalTrials.gov/show/NCT03817658</a> |
| Checkpoint inhibitor | A Phase II Study to Test the Efficacy of AB928 (Dual Adenosine Receptor Antagonist) and AB122 (a PD1 Checkpoint Inhibitor) in Combination With Short Course Radiotherapy and Consolidation Chemotherapy for Rectal Cancer.                                       | Y            |                   | <a href="https://ClinicalTrials.gov/show/NCT05024097">https://ClinicalTrials.gov/show/NCT05024097</a> |
| Checkpoint inhibitor | A Phase II Trial of Preoperative Chemoradiotherapy and MK-3475 for Esophageal Squamous Cell Carcinoma                                                                                                                                                            | Y            |                   | <a href="https://ClinicalTrials.gov/show/NCT02844075">https://ClinicalTrials.gov/show/NCT02844075</a> |
| Checkpoint inhibitor | A Phase III Study to Evaluate Efficacy and Safety of First-Line Treatment With HLX10 + Chemotherapy in Patients With Advanced Cervical Cancer                                                                                                                    | Y            |                   | <a href="https://ClinicalTrials.gov/show/NCT04806945">https://ClinicalTrials.gov/show/NCT04806945</a> |
| Checkpoint inhibitor | A Phase III Trial of Neoadjuvant Sintilimab and Chemotherapy for NSCLC Harboring No Driver Mutations                                                                                                                                                             | Y            |                   | <a href="https://ClinicalTrials.gov/show/NCT05157776">https://ClinicalTrials.gov/show/NCT05157776</a> |
| Checkpoint inhibitor | A Pilot Study to Investigate the Safety and Clinical Activity of Avelumab (MSB0010718C) in Thymoma and Thymic Carcinoma After Progression on Platinum-Based Chemotherapy                                                                                         | Y            |                   | <a href="https://ClinicalTrials.gov/show/NCT03076554">https://ClinicalTrials.gov/show/NCT03076554</a> |
| Checkpoint inhibitor | A Randomized, Double-blind, Placebo Controlled Phase III Study to Investigate Efficacy and Safety of First-Line Treatment With HLX10 + Chemotherapy (Carboplatin-Nanoparticle Albumin Bound (Nab) Paclitaxel) in Patients With Stage IIIB/IIIC or IV NSCLC       | Y            |                   | <a href="https://ClinicalTrials.gov/show/NCT04033354">https://ClinicalTrials.gov/show/NCT04033354</a> |
| Checkpoint inhibitor | A Randomized, Double-blind, Placebo Controlled Phase III Study to Investigate Efficacy and Safety of HLX10 + Chemotherapy (Carboplatin- Etoposide) in Patients With Extensive Stage Small Cell Lung Cancer (ES-SCLC)                                             | Y            |                   | <a href="https://ClinicalTrials.gov/show/NCT04063163">https://ClinicalTrials.gov/show/NCT04063163</a> |
| Checkpoint inhibitor | A Study Comparing Atezolizumab (Anti PD-L1 Antibody) In Combination With Adjuvant Anthracycline/Taxane-Based Chemotherapy Versus Chemotherapy Alone In Patients With Operable Triple-Negative Breast Cancer                                                      | Y            |                   |                                                                                                       |
| Checkpoint inhibitor | A Study Evaluating the Association of Hypofractionated Stereotactic Radiation Therapy and Durvalumab for Patients With Recurrent Glioblastoma                                                                                                                    |              | Y                 | <a href="https://ClinicalTrials.gov/show/NCT02866747">https://ClinicalTrials.gov/show/NCT02866747</a> |
| Checkpoint inhibitor | A Study Evaluating Toripalimab Injection Combined With Standard Chemotherapy as a First-line Treatment for Locally Advanced or Metastatic Urothelial Carcinoma                                                                                                   | Y            |                   | <a href="https://ClinicalTrials.gov/show/NCT04568304">https://ClinicalTrials.gov/show/NCT04568304</a> |
| Checkpoint inhibitor | A Study in Ovarian Cancer Patients Evaluating Rucaparib and Nivolumab as Maintenance Treatment Following Response to Front-Line Platinum-Based Chemotherapy                                                                                                      | Y            |                   | <a href="https://ClinicalTrials.gov/show/NCT03522246">https://ClinicalTrials.gov/show/NCT03522246</a> |
| Checkpoint inhibitor | A Study of Anti-PD-L1 Antibody in Neoadjuvant Chemotherapy of Esophageal Squamous Cell Carcinoma.                                                                                                                                                                | Y            |                   | <a href="https://ClinicalTrials.gov/show/NCT04460066">https://ClinicalTrials.gov/show/NCT04460066</a> |
| Checkpoint inhibitor | A Study of Atezolizumab Administered in Combination With Bevacizumab and/or With Chemotherapy in Participants With Locally Advanced or Metastatic Solid Tumors                                                                                                   | Y            |                   | <a href="https://ClinicalTrials.gov/show/NCT01633970">https://ClinicalTrials.gov/show/NCT01633970</a> |
| Checkpoint inhibitor | A Study of Atezolizumab Compared With Chemotherapy in Participants With Locally Advanced or Metastatic Urothelial Bladder Cancer [IMvigor211]                                                                                                                    | Y            |                   | <a href="https://ClinicalTrials.gov/show/NCT02302807">https://ClinicalTrials.gov/show/NCT02302807</a> |
| Checkpoint inhibitor | A Study of Atezolizumab Compared With Docetaxel in Non-Small Cell Lung Cancer (NSCLC) After Failure With Platinum-Containing Chemotherapy                                                                                                                        | Y            |                   | <a href="https://ClinicalTrials.gov/show/NCT02813785">https://ClinicalTrials.gov/show/NCT02813785</a> |
| Checkpoint inhibitor | A Study of Atezolizumab Compared With Platinum Doublet Chemotherapy for PD-L1 Highly Expressed, Chemotherapy-Naive Patients With Stage IV Non-Squamous or Squamous Non-Small Cell Lung Cancer                                                                    | Y            |                   | <a href="https://ClinicalTrials.gov/show/NCT05047250">https://ClinicalTrials.gov/show/NCT05047250</a> |
| Checkpoint inhibitor | A Study of Atezolizumab in Combination With Carboplatin or Cisplatin + Pemetrexed Compared With Carboplatin or Cisplatin + Pemetrexed in Participants Who Are Chemotherapy-Naive and Have Stage IV Non-Squamous Non-Small Cell Lung Cancer (NSCLC) (IMpower 132) | Y            |                   | <a href="https://ClinicalTrials.gov/show/NCT02657434">https://ClinicalTrials.gov/show/NCT02657434</a> |
| Checkpoint inhibitor | A Study of Camrelizumab Combined With Chemotherapy as Neoadjuvant Therapy in Advanced Esophageal Squamous Cell Carcinoma (ESCC)                                                                                                                                  | Y            |                   | <a href="https://ClinicalTrials.gov/show/NCT04767295">https://ClinicalTrials.gov/show/NCT04767295</a> |
| Checkpoint inhibitor | A Study of Camrelizumab Combined With Concurrent Chemoradiation in Patients With Cervical Cancer                                                                                                                                                                 | Y            | Y                 | <a href="https://ClinicalTrials.gov/show/NCT04974827">https://ClinicalTrials.gov/show/NCT04974827</a> |
| Checkpoint inhibitor | A Study of Camrelizumab Plus Apatinib as Consolidation Therapy in Non-Small Cell Lung Cancer Patients Treated With Chemoradiotherapy                                                                                                                             | Y            |                   | <a href="https://ClinicalTrials.gov/show/NCT04749394">https://ClinicalTrials.gov/show/NCT04749394</a> |
| Checkpoint inhibitor | A Study of Carboplatin-Paclitaxel/Nab-Paclitaxel Chemotherapy With or Without Pembrolizumab (MK-3475) in Adults With First Line Metastatic Squamous Non-small Cell Lung Cancer (MK-3475-407/KEYNOTE-407)                                                         | Y            |                   | <a href="https://ClinicalTrials.gov/show/NCT02775435">https://ClinicalTrials.gov/show/NCT02775435</a> |
| Checkpoint inhibitor | A Study of Carboplatin-Paclitaxel/Nab-Paclitaxel Chemotherapy With or Without Pembrolizumab (MK-3475) in Adults With First Line Metastatic Squamous Non-small Cell Lung Cancer (MK-3475-407/KEYNOTE-407)-China Extension Study                                   | Y            |                   | <a href="https://ClinicalTrials.gov/show/NCT03875092">https://ClinicalTrials.gov/show/NCT03875092</a> |
| Checkpoint inhibitor | A Study of Carilizumab Combined With Concurrent Chemoradiotherapy                                                                                                                                                                                                | Y            |                   | <a href="https://ClinicalTrials.gov/show/NCT05151549">https://ClinicalTrials.gov/show/NCT05151549</a> |
| Checkpoint inhibitor | A Study of Chemoradiation Plus Pembrolizumab for Locally Advanced Laryngeal Squamous Cell Carcinoma                                                                                                                                                              | Y            | Y                 | <a href="https://ClinicalTrials.gov/show/NCT02759575">https://ClinicalTrials.gov/show/NCT02759575</a> |
| Checkpoint inhibitor | A Study of Combination of Anti-PD1 Antibody-activated TILs and Chemotherapy in Colorectal Cancer                                                                                                                                                                 | Y            |                   | <a href="https://ClinicalTrials.gov/show/NCT03904537">https://ClinicalTrials.gov/show/NCT03904537</a> |
| Checkpoint inhibitor | A Study of Concurrent Chemoradiation in Combination With or Without PD1 Inhibitor AB122 Adenosine 2a Receptor / Adenosine 2b Receptor Inhibitor AB928 Therapies in Locally Advanced Head and Neck Cancers                                                        | Y            | Y                 | <a href="https://ClinicalTrials.gov/show/NCT04892875">https://ClinicalTrials.gov/show/NCT04892875</a> |
| Checkpoint inhibitor | A Study of Concurrent Chemoradiation With Atezolizumab in Participants With Untreated Extensive-Stage (ES) Small Cell Lung Cancer (SCLC)                                                                                                                         | Y            | Y                 | <a href="https://ClinicalTrials.gov/show/NCT04636762">https://ClinicalTrials.gov/show/NCT04636762</a> |
| Checkpoint inhibitor | A Study of Dato-DXd Versus Investigator's Choice Chemotherapy in Patients With Locally Recurrent Inoperable or Metastatic Triple-negative Breast Cancer, Who Are Not Candidates for PD-1/PD-L1 Inhibitor Therapy (TROPION-Breast02)                              | Y            |                   | <a href="https://ClinicalTrials.gov/show/NCT05374512">https://ClinicalTrials.gov/show/NCT05374512</a> |
| Checkpoint inhibitor | A Study of Durvalumab (Anti-PDL1) Plus Radiation Therapy for the Treatment of Solitary Bone Plasmacytoma                                                                                                                                                         |              | Y                 | <a href="https://ClinicalTrials.gov/show/NCT03196401">https://ClinicalTrials.gov/show/NCT03196401</a> |
| Checkpoint inhibitor | A Study of Epacadostat in Combination With Pembrolizumab and Chemotherapy in Participants With Advanced or Metastatic Solid Tumors (ECHO-207/KEYNOTE-723)                                                                                                        | Y            |                   | <a href="https://ClinicalTrials.gov/show/NCT03085914">https://ClinicalTrials.gov/show/NCT03085914</a> |
| Checkpoint inhibitor | A Study of HLX07 + HLX10 With or Without Chemotherapy Versus HLX10 With Chemotherapy in First Line sqNSCLC                                                                                                                                                       | Y            |                   | <a href="https://ClinicalTrials.gov/show/NCT04976647">https://ClinicalTrials.gov/show/NCT04976647</a> |
| Checkpoint inhibitor | A Study of INCMGA00012 in Squamous Carcinoma of the Anal Canal Following Platinum-Based Chemotherapy (POD1UM-202)                                                                                                                                                | Y            |                   | <a href="https://ClinicalTrials.gov/show/NCT03597295">https://ClinicalTrials.gov/show/NCT03597295</a> |
| Checkpoint inhibitor | A Study of Nivolumab Plus Chemotherapy in First Line Treatment of Adult Participants With Advanced or Metastatic Gastric Cancer                                                                                                                                  | Y            |                   | <a href="https://ClinicalTrials.gov/show/NCT05165264">https://ClinicalTrials.gov/show/NCT05165264</a> |
| Checkpoint inhibitor | A Study of Pembrolizumab (MK-3475) in Combination With Chemotherapy or Immunotherapy in Participants With Non-small Cell Lung Cancer (MK-3475-021/KEYNOTE-021)                                                                                                   | Y            |                   | <a href="https://ClinicalTrials.gov/show/NCT02039674">https://ClinicalTrials.gov/show/NCT02039674</a> |
| Checkpoint inhibitor | A Study of Pembrolizumab Plus Epacadostat With Platinum-based Chemotherapy Versus Pembrolizumab Plus Platinum-based Chemotherapy Plus Placebo in Metastatic Non-Small Cell Lung Cancer (KEYNOTE-715-06/ECHO-306-06)                                              | Y            |                   | <a href="https://ClinicalTrials.gov/show/NCT03322566">https://ClinicalTrials.gov/show/NCT03322566</a> |

|                      |                                                                                                                                                                                                                                                                                              |   |   |                                                                                                       |
|----------------------|----------------------------------------------------------------------------------------------------------------------------------------------------------------------------------------------------------------------------------------------------------------------------------------------|---|---|-------------------------------------------------------------------------------------------------------|
| Checkpoint inhibitor | A Study of Radiation Therapy With Pembrolizumab and Olaparib in Women Who Have Triple-Negative Breast Cancer                                                                                                                                                                                 |   | Y | <a href="https://ClinicalTrials.gov/show/NCT04683679">https://ClinicalTrials.gov/show/NCT04683679</a> |
| Checkpoint inhibitor | A Study of Sacituzumab With Chemoimmunotherapy to Treat Advanced Triple-Negative Breast Cancer After Prior Therapies                                                                                                                                                                         | Y |   | <a href="https://ClinicalTrials.gov/show/NCT04927884">https://ClinicalTrials.gov/show/NCT04927884</a> |
| Checkpoint inhibitor | A Study of Sargamostim Plus Pembrolizumab With or Without Pemetrexed in Patients With Advance Non-small Cell Lung Cancer After Completion of Chemoimmunotherapy                                                                                                                              | Y |   | <a href="https://ClinicalTrials.gov/show/NCT04856176">https://ClinicalTrials.gov/show/NCT04856176</a> |
| Checkpoint inhibitor | A Study of SHR-1210 in Combination With Apatinib or Chemotherapy in Subjects With Advanced PLC or BTC                                                                                                                                                                                        | Y |   | <a href="https://ClinicalTrials.gov/show/NCT03092895">https://ClinicalTrials.gov/show/NCT03092895</a> |
| Checkpoint inhibitor | A Study of Sintilimab Plus Chemoradiation Before Surgery for Esophageal Cancer                                                                                                                                                                                                               | Y | Y | <a href="https://ClinicalTrials.gov/show/NCT03940001">https://ClinicalTrials.gov/show/NCT03940001</a> |
| Checkpoint inhibitor | A Study of the Efficacy and Safety of Chemotherapy Combined With Toripalimab in Advanced Biliary Tract Cancer                                                                                                                                                                                | Y |   | <a href="https://ClinicalTrials.gov/show/NCT03796429">https://ClinicalTrials.gov/show/NCT03796429</a> |
| Checkpoint inhibitor | A Study of the Efficacy and Safety of R07198457 in Combination With Atezolizumab Versus Atezolizumab Alone Following Adjuvant Platinum-Doublet Chemotherapy in Participants Who Are cDNA Positive After Surgical Resection of Stage II-III Non-Small Cell Lung Cancer                        | Y |   | <a href="https://ClinicalTrials.gov/show/NCT04267237">https://ClinicalTrials.gov/show/NCT04267237</a> |
| Checkpoint inhibitor | A Study of Tislelizumab (BGB-A317) Plus Chemoradiotherapy Followed by Tislelizumab Monotherapy in Newly Diagnosed, Stage III Subjects With Locally Advanced, Unresectable Non-small Cell Lung Cancer                                                                                         | Y |   | <a href="https://ClinicalTrials.gov/show/NCT03745222">https://ClinicalTrials.gov/show/NCT03745222</a> |
| Checkpoint inhibitor | A Study of Tislelizumab (BGB-A317) Versus Chemotherapy as Second Line Treatment in Participants With Advanced Esophageal Squamous Cell Carcinoma                                                                                                                                             | Y |   | <a href="https://ClinicalTrials.gov/show/NCT03430843">https://ClinicalTrials.gov/show/NCT03430843</a> |
| Checkpoint inhibitor | A Study of Toripalimab Combined With Concurrent Chemoradiotherapy for Locally Advanced Esophageal Squamous Cell Carcinoma.                                                                                                                                                                   | Y |   | <a href="https://ClinicalTrials.gov/show/NCT04084158">https://ClinicalTrials.gov/show/NCT04084158</a> |
| Checkpoint inhibitor | A Study of Zanidatamab in Combination With Chemotherapy Plus or Minus Tislelizumab in Patients With HER2-positive Advanced or Metastatic Gastric and Esophageal Cancers                                                                                                                      | Y |   | <a href="https://ClinicalTrials.gov/show/NCT05152147">https://ClinicalTrials.gov/show/NCT05152147</a> |
| Checkpoint inhibitor | A Study Tislelizumab in Combination With Chemotherapy Versus Chemotherapy in Advanced Lung Cancer.                                                                                                                                                                                           | Y |   | <a href="https://ClinicalTrials.gov/show/NCT03594747">https://ClinicalTrials.gov/show/NCT03594747</a> |
| Checkpoint inhibitor | A Study to Evaluate Enfortumab Vedotin (ASG-22CE) in Chinese Subjects With Locally Advanced or Metastatic Urothelial Cancer Who Previously Received Platinum-containing Chemotherapy and PD 1/PD-L1 Inhibitor Therapy                                                                        | Y |   | <a href="https://ClinicalTrials.gov/show/NCT04995419">https://ClinicalTrials.gov/show/NCT04995419</a> |
| Checkpoint inhibitor | A Study to Evaluate the Efficacy and Safety of Sintilimab Plus Apatinib and Chemotherapy in Patients With HER2 Negative Microsatellite Stability (MSS) Advanced or Metastatic Gastric (GC) or Gastroesophageal Junction (GEJ) Cancer                                                         | Y |   | <a href="https://ClinicalTrials.gov/show/NCT05216237">https://ClinicalTrials.gov/show/NCT05216237</a> |
| Checkpoint inhibitor | A Study to Investigate Atezolizumab and Chemotherapy Compared With Placebo and Chemotherapy in the Neoadjuvant Setting in Participants With Early Stage Triple Negative Breast Cancer                                                                                                        | Y |   | <a href="https://ClinicalTrials.gov/show/NCT03197935">https://ClinicalTrials.gov/show/NCT03197935</a> |
| Checkpoint inhibitor | A Survival Observational Study in Patients With Advanced IIIB-IV Squamous Cell Lung Cancer Receiving PD-1 Combination With Chemotherapy                                                                                                                                                      | Y |   | <a href="https://ClinicalTrials.gov/show/NCT04306042">https://ClinicalTrials.gov/show/NCT04306042</a> |
| Checkpoint inhibitor | A Trial Evaluating Stereotactic Radiotherapy Plus Durvalumab Continuation for Patients With NSCLC Metachronous Oligometastatic Disease Under Durvalumab Consolidation Following Chemoradiation                                                                                               | Y | Y | <a href="https://ClinicalTrials.gov/show/NCT03955198">https://ClinicalTrials.gov/show/NCT03955198</a> |
| Checkpoint inhibitor | A Trial of AK112 (PD1/VEGF Bispecific) in Combination With Chemotherapy in Patients With NSCLC                                                                                                                                                                                               | Y |   | <a href="https://ClinicalTrials.gov/show/NCT04736823">https://ClinicalTrials.gov/show/NCT04736823</a> |
| Checkpoint inhibitor | A Trial of GFH018 in Combination With Toripalimab and Concurrent Chemoradiotherapy in Stage III NSCLC                                                                                                                                                                                        | Y |   | <a href="https://ClinicalTrials.gov/show/NCT05386888">https://ClinicalTrials.gov/show/NCT05386888</a> |
| Checkpoint inhibitor | A Trial of PEGPH20 in Combination With Avelumab in Chemotherapy Resistant Pancreatic Cancer                                                                                                                                                                                                  | Y |   | <a href="https://ClinicalTrials.gov/show/NCT03481920">https://ClinicalTrials.gov/show/NCT03481920</a> |
| Checkpoint inhibitor | A Trial of Pembrolizumab in Combination With Chemotherapy and Radiotherapy in Stage III NSCLC (KEYNOTE-799, MK-3475-799).                                                                                                                                                                    | Y |   | <a href="https://ClinicalTrials.gov/show/NCT03631784">https://ClinicalTrials.gov/show/NCT03631784</a> |
| Checkpoint inhibitor | A Trial of SHR-1316/Placebo in Combination With Chemotherapy in Patients With Resectable NSCLC                                                                                                                                                                                               | Y |   | <a href="https://ClinicalTrials.gov/show/NCT04316364">https://ClinicalTrials.gov/show/NCT04316364</a> |
| Checkpoint inhibitor | Adding Neoadjuvant and Adjuvant PD-1 Inhibitor to Neoadjuvant Chemotherapy Plus Concurrent Chemoradiotherapy in the Treatment of High-risk Nasopharyngeal Carcinoma                                                                                                                          | Y |   | <a href="https://ClinicalTrials.gov/show/NCT04557020">https://ClinicalTrials.gov/show/NCT04557020</a> |
| Checkpoint inhibitor | Addition of PD-L1 Antibody MEDI4736 to a Taxane-antiracycline Chemotherapy in Triple Negative Breast Cancer                                                                                                                                                                                  | Y |   | <a href="https://ClinicalTrials.gov/show/NCT02685059">https://ClinicalTrials.gov/show/NCT02685059</a> |
| Checkpoint inhibitor | Adjuvant Chemotherapy and Anti-PD-1 Antibody in Patients With Stage IIIC2-IVB Cervical Cancer                                                                                                                                                                                                | Y |   | <a href="https://ClinicalTrials.gov/show/NCT04918628">https://ClinicalTrials.gov/show/NCT04918628</a> |
| Checkpoint inhibitor | Afuresitib +Sintilimab+Chemotherapy in Patients With Selected Solid Tumors That Resistance to Prior Anti-PD-1/PD-L1                                                                                                                                                                          | Y |   | <a href="https://ClinicalTrials.gov/show/NCT05383482">https://ClinicalTrials.gov/show/NCT05383482</a> |
| Checkpoint inhibitor | AK104 Combined With Chemotherapy as Neoadjuvant Treatment for Advanced Ovarian Cancer                                                                                                                                                                                                        | Y |   | <a href="https://ClinicalTrials.gov/show/NCT05430906">https://ClinicalTrials.gov/show/NCT05430906</a> |
| Checkpoint inhibitor | AMP-224, a PD-1 Inhibitor, With Stereotactic Body Radiation Therapy in Metastatic Colorectal Cancer                                                                                                                                                                                          |   | Y | <a href="https://ClinicalTrials.gov/show/NCT02298946">https://ClinicalTrials.gov/show/NCT02298946</a> |
| Checkpoint inhibitor | An Open-Label, Randomized, Phase 3 Trial of Nivolumab Versus Investigator's Choice Chemotherapy as First-Line Therapy for Stage IV or Recurrent PD-L1+ Non-Small Cell Lung Cancer (CheckMate 026)                                                                                            | Y |   | <a href="https://ClinicalTrials.gov/show/NCT02041533">https://ClinicalTrials.gov/show/NCT02041533</a> |
| Checkpoint inhibitor | Antioltinb in Combination With PD-1/L1 Inhibitor As Sequential Therapy of Thoracic Radiotherapy After Induction Chemotherapy For Extensive-Stage Small Cell Lung Cancer:A Single Arm Study                                                                                                   | Y |   | <a href="https://ClinicalTrials.gov/show/NCT04313660">https://ClinicalTrials.gov/show/NCT04313660</a> |
| Checkpoint inhibitor | Antioltinb Plus PD-1 Antibody in Standard Chemotherapy Failure Advanced NSCLC the ATHENA Study                                                                                                                                                                                               | Y |   | <a href="https://ClinicalTrials.gov/show/NCT04322617">https://ClinicalTrials.gov/show/NCT04322617</a> |
| Checkpoint inhibitor | Anti PD-1 Antibody With Radiation Therapy in Patients With HER2-negative Metastatic Breast Cancer                                                                                                                                                                                            |   | Y | <a href="https://ClinicalTrials.gov/show/NCT03432598">https://ClinicalTrials.gov/show/NCT03432598</a> |
| Checkpoint inhibitor | Anti-PD-1 and Chemotherapy for R/R Hodgkin Lymphoma                                                                                                                                                                                                                                          | Y |   | <a href="https://ClinicalTrials.gov/show/NCT03664323">https://ClinicalTrials.gov/show/NCT03664323</a> |
| Checkpoint inhibitor | Anti-PD-1 and mDCF Followed by Chemoradiotherapy in Patients With Stage III Squamous Cell Anal Carcinoma.                                                                                                                                                                                    | Y |   | <a href="https://ClinicalTrials.gov/show/NCT04719988">https://ClinicalTrials.gov/show/NCT04719988</a> |
| Checkpoint inhibitor | Anti-PD-1 and VEGF Bispecific Antibody AK112 in Combination With Chemotherapy in Patients With ES-SCLC                                                                                                                                                                                       | Y |   | <a href="https://ClinicalTrials.gov/show/NCT05116007">https://ClinicalTrials.gov/show/NCT05116007</a> |
| Checkpoint inhibitor | Anti-PD-1 Antibody Alone or in Combination With Decitabine/Chemotherapy in Relapsed or Refractory Malignancies                                                                                                                                                                               | Y |   | <a href="https://ClinicalTrials.gov/show/NCT02961101">https://ClinicalTrials.gov/show/NCT02961101</a> |
| Checkpoint inhibitor | Anti-PD-1 Antibody and P-GEMOX Chemotherapy Combined With Radiotherapy in High-risk Early-Stage ENKTL                                                                                                                                                                                        | Y |   | <a href="https://ClinicalTrials.gov/show/NCT05254899">https://ClinicalTrials.gov/show/NCT05254899</a> |
| Checkpoint inhibitor | Anti-PD-1 in Combination With Chemotherapy as First-Line Treatment to Lung Cancer                                                                                                                                                                                                            | Y |   | <a href="https://ClinicalTrials.gov/show/NCT03432598">https://ClinicalTrials.gov/show/NCT03432598</a> |
| Checkpoint inhibitor | Antitumor Activity of Neoadjuvant Chemotherapy With or Without BINTRAFUSP ALFA in Patients With Metastatic Advanced Stage Ovarian Cancer                                                                                                                                                     | Y |   | <a href="https://ClinicalTrials.gov/show/NCT05145569">https://ClinicalTrials.gov/show/NCT05145569</a> |
| Checkpoint inhibitor | Apatinib Combined With Chemotherapy Versus Chemotherapy in Second-line Gastric Cancer Receiving Prior Anti-PD-1 Therapy                                                                                                                                                                      | Y |   | <a href="https://ClinicalTrials.gov/show/NCT05029453">https://ClinicalTrials.gov/show/NCT05029453</a> |
| Checkpoint inhibitor | ATALANTE: Atezolizumab vs Placebo Phase III Study in Late Relapse Ovarian Cancer Treated With Chemotherapy+Bevacizumab                                                                                                                                                                       | Y |   | <a href="https://ClinicalTrials.gov/show/NCT02891824">https://ClinicalTrials.gov/show/NCT02891824</a> |
| Checkpoint inhibitor | Atezolizumab After Chemo-radiotherapy for MIBC Patients Not Eligible for Radical Cystectomy                                                                                                                                                                                                  | Y |   | <a href="https://ClinicalTrials.gov/show/NCT03697850">https://ClinicalTrials.gov/show/NCT03697850</a> |
| Checkpoint inhibitor | Atezolizumab Before and/or With Chemoradiotherapy in Immune System Activation in Patients With Node Positive Stage IB2, II, IIIB, or IVA Cervical Cancer                                                                                                                                     | Y |   | <a href="https://ClinicalTrials.gov/show/NCT03738228">https://ClinicalTrials.gov/show/NCT03738228</a> |
| Checkpoint inhibitor | Avelumab in Chemo-resistant Gestational Trophoblastic Neoplasias                                                                                                                                                                                                                             | Y |   | <a href="https://ClinicalTrials.gov/show/NCT03135769">https://ClinicalTrials.gov/show/NCT03135769</a> |
| Checkpoint inhibitor | Avelumab Treatment in Patients With Neuroendocrine Carcinomas (NEC G3) Progressive After Chemotherapy                                                                                                                                                                                        | Y |   | <a href="https://ClinicalTrials.gov/show/NCT03352934">https://ClinicalTrials.gov/show/NCT03352934</a> |
| Checkpoint inhibitor | Avelumab With Chemoradiation in Locally Advanced Rectal Cancer                                                                                                                                                                                                                               | Y | Y | <a href="https://ClinicalTrials.gov/show/NCT03299660">https://ClinicalTrials.gov/show/NCT03299660</a> |
| Checkpoint inhibitor | Avelumab With Hypofractionated Radiation Therapy in Adults With Isocitrate Dehydrogenase (IDH) Mutant Glioblastoma                                                                                                                                                                           |   | Y | <a href="https://ClinicalTrials.gov/show/NCT02968940">https://ClinicalTrials.gov/show/NCT02968940</a> |
| Checkpoint inhibitor | Balstilimab Versus Investigator Choice Chemotherapy in Patients With Recurrent Cervical Cancer (BRAVA)                                                                                                                                                                                       | Y |   | <a href="https://ClinicalTrials.gov/show/NCT04943627">https://ClinicalTrials.gov/show/NCT04943627</a> |
| Checkpoint inhibitor | Bempegaldesleukin (NKTR-214) With Radiation and Anti-PD-1 Immunotherapy for Head and Neck Squamous Cell Carcinoma                                                                                                                                                                            |   | Y | <a href="https://ClinicalTrials.gov/show/NCT04936841">https://ClinicalTrials.gov/show/NCT04936841</a> |
| Checkpoint inhibitor | BGB A317 in Combination With Chemotherapy as First-Line Treatment in Adults With Inoperable, Locally Advanced or Metastatic Esophageal, Gastric, or Gastroesophageal Junction Carcinoma                                                                                                      | Y |   | <a href="https://ClinicalTrials.gov/show/NCT03469557">https://ClinicalTrials.gov/show/NCT03469557</a> |
| Checkpoint inhibitor | Biomarker Analysis in High PD-L1 Expressing NSCLC Patients Treated With PD-1/PD-L1 Based Therapy With or Without the Addition of Platinum Based Chemotherapy                                                                                                                                 | Y |   | <a href="https://ClinicalTrials.gov/show/NCT04676386">https://ClinicalTrials.gov/show/NCT04676386</a> |
| Checkpoint inhibitor | Biomarkers of Response to Pembrolizumab Combined With Chemotherapy in Non-Small Cell Lung Cancer (KEYNOTE-782, MK-3475-782)                                                                                                                                                                  | Y |   | <a href="https://ClinicalTrials.gov/show/NCT03664024">https://ClinicalTrials.gov/show/NCT03664024</a> |
| Checkpoint inhibitor | Biomarkers of Response to Pembrolizumab Combined With Chemotherapy in Non-Small Cell Lung Cancer (KEYNOTE-782, MK-3475-782)                                                                                                                                                                  | Y |   | <a href="https://ClinicalTrials.gov/show/NCT03664024">https://ClinicalTrials.gov/show/NCT03664024</a> |
| Checkpoint inhibitor | BLAST MRD AML-1: BLockade of PD-1 Added to Standard Therapy to Target Measurable Residual Disease in Acute Myeloid Leukemia 1- A Randomized Phase 2 Study of Anti-PD-1 Pembrolizumab in Combination With Intensive Chemotherapy as Frontline Therapy in Patients With Acute Myeloid Leukemia | Y |   | <a href="https://ClinicalTrials.gov/show/NCT04214249">https://ClinicalTrials.gov/show/NCT04214249</a> |
| Checkpoint inhibitor | Blockade of PD-1 in Conjunction With the Dendritic Cell/AML Vaccine Following Chemotherapy Induced Remission                                                                                                                                                                                 | Y |   | <a href="https://ClinicalTrials.gov/show/NCT01096602">https://ClinicalTrials.gov/show/NCT01096602</a> |
| Checkpoint inhibitor | Camrelizumab Combined With Chemotherapy for Recurrent or Advanced Cervical Neuroendocrine Carcinomas                                                                                                                                                                                         | Y |   | <a href="https://ClinicalTrials.gov/show/NCT04635956">https://ClinicalTrials.gov/show/NCT04635956</a> |
| Checkpoint inhibitor | Camrelizumab Combined With Induction Chemotherapy and Intensity Modulated Radiotherapy for the Treatment of Locally Advanced Nasopharyngeal Carcinoma                                                                                                                                        | Y |   | <a href="https://ClinicalTrials.gov/show/NCT05097209">https://ClinicalTrials.gov/show/NCT05097209</a> |
| Checkpoint inhibitor | Camrelizumab With Chemotherapy in Adults With Medically Inoperable Early Stage NSCLC                                                                                                                                                                                                         | Y |   | <a href="https://ClinicalTrials.gov/show/NCT04530227">https://ClinicalTrials.gov/show/NCT04530227</a> |

|                      |                                                                                                                                                                                                                                            |   |   |                                                                                                       |
|----------------------|--------------------------------------------------------------------------------------------------------------------------------------------------------------------------------------------------------------------------------------------|---|---|-------------------------------------------------------------------------------------------------------|
| Checkpoint inhibitor | Cemiplimab and ISA101b Vaccine in Adult Participants With Recurrent/Metastatic Human Papillomavirus (HPV)16 Cervical Cancer Who Have Experienced Disease Progression After First Line Chemotherapy                                         | Y |   | <a href="https://ClinicalTrials.gov/show/NCT04646005">https://ClinicalTrials.gov/show/NCT04646005</a> |
| Checkpoint inhibitor | Chemoradiation vs Immunotherapy and Radiation for Head and Neck Cancer                                                                                                                                                                     | Y | Y | <a href="https://ClinicalTrials.gov/show/NCT03383094">https://ClinicalTrials.gov/show/NCT03383094</a> |
| Checkpoint inhibitor | Chemoradiotherapy Combined With or Without PD-1 Blockade in Anal Canal Squamous Carcinoma Patients                                                                                                                                         | Y |   | <a href="https://ClinicalTrials.gov/show/NCT05374252">https://ClinicalTrials.gov/show/NCT05374252</a> |
| Checkpoint inhibitor | Chemoradiotherapy Plus Anti-PD1 in Recurrent NPC: A Multicenter, Open-label, Randomised, Controlled, Phase III Trial                                                                                                                       | Y |   | <a href="https://ClinicalTrials.gov/show/NCT05340491">https://ClinicalTrials.gov/show/NCT05340491</a> |
| Checkpoint inhibitor | Chemoradiotherapy With or Without Sinitlimab in Limited-stage SCLC                                                                                                                                                                         | Y |   | <a href="https://ClinicalTrials.gov/show/NCT04189094">https://ClinicalTrials.gov/show/NCT04189094</a> |
| Checkpoint inhibitor | Chemotherapy Combined With Apatinib and PD-1 Antibody                                                                                                                                                                                      | Y |   | <a href="https://ClinicalTrials.gov/show/NCT05025033">https://ClinicalTrials.gov/show/NCT05025033</a> |
| Checkpoint inhibitor | Chemotherapy Combined With Immunotherapy in HER 2 Insertion or Amplification Advanced NSCLC                                                                                                                                                | Y |   | <a href="https://ClinicalTrials.gov/show/NCT04324125">https://ClinicalTrials.gov/show/NCT04324125</a> |
| Checkpoint inhibitor | Chemotherapy Combines With Bevacizumab and PD-1 Inhibitor in Non-squamous NSCLC                                                                                                                                                            | Y |   | <a href="https://ClinicalTrials.gov/show/NCT05267366">https://ClinicalTrials.gov/show/NCT05267366</a> |
| Checkpoint inhibitor | Chemotherapy or Chemotherapy Plus PD-1 Antibody in RET Fusion Positive Advanced NSCLC Patints: the POSEIDON Trial                                                                                                                          | Y |   | <a href="https://ClinicalTrials.gov/show/NCT04322591">https://ClinicalTrials.gov/show/NCT04322591</a> |
| Checkpoint inhibitor | Chemotherapy Plus Subsequent Loco-regional Radiotherapy Combined With Toripalimab in the De Novo Metastatic Nasopharyngeal Carcinoma                                                                                                       | Y |   | <a href="https://ClinicalTrials.gov/show/NCT04398056">https://ClinicalTrials.gov/show/NCT04398056</a> |
| Checkpoint inhibitor | Chemotherapy With Pembrolizumab Continuation After Progression to PD-1/L1 Inhibitors                                                                                                                                                       | Y |   | <a href="https://ClinicalTrials.gov/show/NCT03656094">https://ClinicalTrials.gov/show/NCT03656094</a> |
| Checkpoint inhibitor | Chidamide Plus Sinitlimab for Chemotherapy-refractory Advanced High-grade Neuroendocrine Neoplasm                                                                                                                                          | Y |   | <a href="https://ClinicalTrials.gov/show/NCT05113355">https://ClinicalTrials.gov/show/NCT05113355</a> |
| Checkpoint inhibitor | Clinical Study of Camrelizumab in Combination With Neoadjuvant Chemotherapy for Operable Locally Advanced Head and Neck Squamous Cell Carcinoma                                                                                            | Y |   | <a href="https://ClinicalTrials.gov/show/NCT04922450">https://ClinicalTrials.gov/show/NCT04922450</a> |
| Checkpoint inhibitor | Clinical Study of Neoadjuvant PD-1 Antibody (Toripalimab) Plus Chemotherapy for Locally Advanced Thymic Epithelial Tumor                                                                                                                   | Y |   | <a href="https://ClinicalTrials.gov/show/NCT04667793">https://ClinicalTrials.gov/show/NCT04667793</a> |
| Checkpoint inhibitor | Clinical Study of PD-1 Antibody (BGB-A317) Plus Chemotherapy (Cisplatin and Etoposide) for Limited Stage Small Cell Lung Cancer                                                                                                            | Y |   | <a href="https://ClinicalTrials.gov/show/NCT04542369">https://ClinicalTrials.gov/show/NCT04542369</a> |
| Checkpoint inhibitor | Clinical Study of PD-L1 Antibody (TQB2450) Plus Chemotherapy (Cisplatin and Etoposide) for Previously Untreated Small Cell Lung Cancer                                                                                                     | Y |   | <a href="https://ClinicalTrials.gov/show/NCT04539977">https://ClinicalTrials.gov/show/NCT04539977</a> |
| Checkpoint inhibitor | Clinical Study of SHR-1701 Plus Chemotherapy as Perioperative Treatment in Subjects With Gastric Cancer                                                                                                                                    | Y |   | <a href="https://ClinicalTrials.gov/show/NCT05149807">https://ClinicalTrials.gov/show/NCT05149807</a> |
| Checkpoint inhibitor | Clinical Trial of Neoadjuvant Chemotherapy With Atezolizumab or Placebo in Patients With Triple-Negative Breast Cancer Followed After Surgery by Atezolizumab or Placebo                                                                   | Y |   | <a href="https://ClinicalTrials.gov/show/NCT03281954">https://ClinicalTrials.gov/show/NCT03281954</a> |
| Checkpoint inhibitor | Combination of Anti-PD-1 Antibody and Chemotherapy for Unresectable Intrahepatic Cholangiocarcinoma                                                                                                                                        | Y |   | <a href="https://ClinicalTrials.gov/show/NCT04413734">https://ClinicalTrials.gov/show/NCT04413734</a> |
| Checkpoint inhibitor | Combination of Anti-PD-1 Antibody and Chemotherapy in Metastatic Pancreatic Cancer                                                                                                                                                         | Y |   | <a href="https://ClinicalTrials.gov/show/NCT03977272">https://ClinicalTrials.gov/show/NCT03977272</a> |
| Checkpoint inhibitor | Combination of Anti-PD-1 Antibody and Chemotherapy in Pancreatic Cancer                                                                                                                                                                    | Y |   | <a href="https://ClinicalTrials.gov/show/NCT03983057">https://ClinicalTrials.gov/show/NCT03983057</a> |
| Checkpoint inhibitor | Combination of Chemotherapy Plus RT and SHR-1210 to Treat Patients With ESCC                                                                                                                                                               | Y |   | <a href="https://ClinicalTrials.gov/show/NCT03671265">https://ClinicalTrials.gov/show/NCT03671265</a> |
| Checkpoint inhibitor | Combination of Radiation Therapy and Anti-PD-1 Antibody in Treating Patients With Pancreatic Cancer                                                                                                                                        |   | Y | <a href="https://ClinicalTrials.gov/show/NCT03374293">https://ClinicalTrials.gov/show/NCT03374293</a> |
| Checkpoint inhibitor | Combination of Radiation Therapy and Anti-PD-1 Antibody SHR-1210 in Treating Patients With Esophageal Cancer                                                                                                                               |   | Y | <a href="https://ClinicalTrials.gov/show/NCT03187314">https://ClinicalTrials.gov/show/NCT03187314</a> |
| Checkpoint inhibitor | Combination Radiation and PD-1 Inhibition in Metastatic or Recurrent Renal Cell Carcinoma (RCC)                                                                                                                                            |   | Y | <a href="https://ClinicalTrials.gov/show/NCT02962804">https://ClinicalTrials.gov/show/NCT02962804</a> |
| Checkpoint inhibitor | Combinations of Cemiplimab (Anti-PD-1 Antibody) and Platinum-based Doublet Chemotherapy in Patients With Lung Cancer                                                                                                                       | Y |   | <a href="https://ClinicalTrials.gov/show/NCT03409614">https://ClinicalTrials.gov/show/NCT03409614</a> |
| Checkpoint inhibitor | Combinatory ImmunoTherapy-1 (Com-IT-1) Irradiation and PD-1 Blockade in Locally Advanced / Advanced NSCLC                                                                                                                                  |   | Y | <a href="https://ClinicalTrials.gov/show/NCT03644823">https://ClinicalTrials.gov/show/NCT03644823</a> |
| Checkpoint inhibitor | Combined Atezolizumab and Chemotherapy (Carboplatin Plus Etoposide) in Neoadjuvant Treating Limited-Stage Small Cell Lung Cancer Patients                                                                                                  | Y |   | <a href="https://ClinicalTrials.gov/show/NCT04696939">https://ClinicalTrials.gov/show/NCT04696939</a> |
| Checkpoint inhibitor | Combined Inhibition of PD-1 and DNA Hypomethylating Agent +/- Chemotherapy in High-risk AML or Elderly Patients With AML Who Are Unfit for Intensive Chemotherapy                                                                          | Y |   | <a href="https://ClinicalTrials.gov/show/NCT04541277">https://ClinicalTrials.gov/show/NCT04541277</a> |
| Checkpoint inhibitor | Combined Therapy Using Oxaliplatin and Gemcitabine Chemotherapy, Lenvatinib and PD1 Antibody (JS001) for Patients With Advanced and Unresectable Intrahepatic Cholangiocarcinoma                                                           | Y |   | <a href="https://ClinicalTrials.gov/show/NCT03951597">https://ClinicalTrials.gov/show/NCT03951597</a> |
| Checkpoint inhibitor | Combining RT With Toripalimab and Chemotherapy in Metastatic Nasopharyngeal Carcinoma                                                                                                                                                      | Y |   | <a href="https://ClinicalTrials.gov/show/NCT05385926">https://ClinicalTrials.gov/show/NCT05385926</a> |
| Checkpoint inhibitor | Comparing Chemotherapy With/Without Toripalimab For Primary Metastatic Nasopharyngeal Carcinoma                                                                                                                                            | Y |   | <a href="https://ClinicalTrials.gov/show/NCT04517214">https://ClinicalTrials.gov/show/NCT04517214</a> |
| Checkpoint inhibitor | Comparing the New Anti-cancer Drug Eribulin With or Without Chemotherapy Against the Usual Chemotherapy Alone in Metastatic Urothelial Cancer                                                                                              | Y |   | <a href="https://ClinicalTrials.gov/show/NCT04579224">https://ClinicalTrials.gov/show/NCT04579224</a> |
| Checkpoint inhibitor | Concurrent and Adjuvant PD-1 Blockade Combined With Induction Chemotherapy Plus Radiotherapy in Nasopharyngeal Carcinoma                                                                                                                   | Y |   | <a href="https://ClinicalTrials.gov/show/NCT03984357">https://ClinicalTrials.gov/show/NCT03984357</a> |
| Checkpoint inhibitor | Concurrent and Adjuvant PD1 Treatment Combined With Chemo-radiotherapy for High-risk Nasopharyngeal Carcinoma                                                                                                                              | Y |   | <a href="https://ClinicalTrials.gov/show/NCT04453826">https://ClinicalTrials.gov/show/NCT04453826</a> |
| Checkpoint inhibitor | Consolidation Sinitlimab After Concurrent Chemoradiation in Patients With Unresectable Stage III NSCLC                                                                                                                                     | Y | Y | <a href="https://ClinicalTrials.gov/show/NCT03884192">https://ClinicalTrials.gov/show/NCT03884192</a> |
| Checkpoint inhibitor | CT-Guided Adaptive Radiation Therapy Combine With Anti-PD-1 Antibody Adjuvant Immunotherapy for Thoracic Cancer Patients                                                                                                                   |   | Y | <a href="https://ClinicalTrials.gov/show/NCT03732430">https://ClinicalTrials.gov/show/NCT03732430</a> |
| Checkpoint inhibitor | CTLA-4 /PD-L1 Blockade Following Transarterial Chemoembolization (DEB-TACE) in Patients With Intermediate Stage of HCC (Hepatocellular Carcinoma) Using Durvalumab and Tremelimumab                                                        | Y |   | <a href="https://ClinicalTrials.gov/show/NCT03638141">https://ClinicalTrials.gov/show/NCT03638141</a> |
| Checkpoint inhibitor | Disilamab Vedotin Combined With PD-1 and Neoadjuvant Chemotherapy for Locally Advanced Gastric Cancer                                                                                                                                      | Y |   | <a href="https://ClinicalTrials.gov/show/NCT05113459">https://ClinicalTrials.gov/show/NCT05113459</a> |
| Checkpoint inhibitor | Durvalumab And Radiation Therapy Followed by Adjuvant Durvalumab in Patients With Urothelial Cancer (T2-4 N0-2 M0) of the Bladder                                                                                                          |   | Y | <a href="https://ClinicalTrials.gov/show/NCT02891161">https://ClinicalTrials.gov/show/NCT02891161</a> |
| Checkpoint inhibitor | Durvalumab in Combination With a CSF-1R Inhibitor (SNDX-6532) Following Chemo or Radio-Embolization for Patients With Intrahepatic Cholangiocarcinoma                                                                                      | Y |   | <a href="https://ClinicalTrials.gov/show/NCT04301778">https://ClinicalTrials.gov/show/NCT04301778</a> |
| Checkpoint inhibitor | Durvalumab in Combination With a CSF-1R Inhibitor (SNDX-6532) Following Chemo or Radio-Embolization for Patients With Intrahepatic Cholangiocarcinoma                                                                                      | Y |   | <a href="https://ClinicalTrials.gov/show/NCT04301778">https://ClinicalTrials.gov/show/NCT04301778</a> |
| Checkpoint inhibitor | Durvalumab in Combination With Chemotherapy in Treating Patients With Advanced Solid Tumors, (DURVA+ Study)                                                                                                                                | Y |   | <a href="https://ClinicalTrials.gov/show/NCT03907475">https://ClinicalTrials.gov/show/NCT03907475</a> |
| Checkpoint inhibitor | Durvalumab Plus CV301 With Maintenance Chemotherapy in Metastatic Colorectal or Pancreatic Adenocarcinoma                                                                                                                                  | Y |   | <a href="https://ClinicalTrials.gov/show/NCT03376659">https://ClinicalTrials.gov/show/NCT03376659</a> |
| Checkpoint inhibitor | Durvalumab vs Placebo With Stereotactic Body Radiation Therapy in Early Stage Unresected Non-small Cell Lung Cancer (NSCLC) Patients / Osimertinib Following SBRT in Patients With Early Stage Unresected NSCLC Harboring an EGFR Mutation |   | Y | <a href="https://ClinicalTrials.gov/show/NCT03833154">https://ClinicalTrials.gov/show/NCT03833154</a> |
| Checkpoint inhibitor | DuRValumab With chEmotherapy as First Line treatMent in Advanced Pleural Mesothelioma                                                                                                                                                      | Y |   | <a href="https://ClinicalTrials.gov/show/NCT04334759">https://ClinicalTrials.gov/show/NCT04334759</a> |
| Checkpoint inhibitor | Durvalumab, an Anti-PDL1 Antibody, and Tremelimumab, an Anti-CTLA4 Antibody, and Chemoradiation Before Surgery for Esophageal Cancer                                                                                                       | Y | Y | <a href="https://ClinicalTrials.gov/show/NCT02962063">https://ClinicalTrials.gov/show/NCT02962063</a> |
| Checkpoint inhibitor | Durvalumab(MED4736) After chemoRadioTherapy(DART) for NSCLC-a Translational and Biomarker Study                                                                                                                                            | Y |   | <a href="https://ClinicalTrials.gov/show/NCT04392505">https://ClinicalTrials.gov/show/NCT04392505</a> |
| Checkpoint inhibitor | Dynamic PET/CT Evaluated the Response of Neoadjuvant Anti-PD1 Combination With Chemotherapy for NSCLC                                                                                                                                      | Y |   | <a href="https://ClinicalTrials.gov/show/NCT04586465">https://ClinicalTrials.gov/show/NCT04586465</a> |
| Checkpoint inhibitor | Effect of Chemotherapy on PD-L1 in NSCLC                                                                                                                                                                                                   | Y |   | <a href="https://ClinicalTrials.gov/show/NCT03701607">https://ClinicalTrials.gov/show/NCT03701607</a> |
| Checkpoint inhibitor | Effect of Chemotherapy on TMB in NSCLC                                                                                                                                                                                                     | Y |   | <a href="https://ClinicalTrials.gov/show/NCT03683407">https://ClinicalTrials.gov/show/NCT03683407</a> |
| Checkpoint inhibitor | Effectiveness of Neoadjuvant Chemotherapy Combined With PD-1 Monoclonal Antibody in the Treatment of Operable Esophageal Squamous Cell Carcinoma                                                                                           | Y |   | <a href="https://ClinicalTrials.gov/show/NCT05174325">https://ClinicalTrials.gov/show/NCT05174325</a> |
| Checkpoint inhibitor | Efficacy and Safety of BCD-100 (Anti-PD-1) in Combination With Platinum-Based Chemotherapy and Bevacizumab in Patients With Recurrent, Persistent or Metastatic Cervical Cancer (CAESURA)                                                  | Y |   | <a href="https://ClinicalTrials.gov/show/NCT03912402">https://ClinicalTrials.gov/show/NCT03912402</a> |
| Checkpoint inhibitor | Efficacy and Safety of BCD-100 (Anti-PD-1) in Combination With Platinum-Based Chemotherapy as First Line Treatment in Patients With Advanced Non-Squamous NSCLC                                                                            | Y |   | <a href="https://ClinicalTrials.gov/show/NCT03912389">https://ClinicalTrials.gov/show/NCT03912389</a> |
| Checkpoint inhibitor | Efficacy and Safety of BCD-100 (Anti-PD-1) in Combination With Platinum-Based Chemotherapy With and Without Bevacizumab as First-Line Treatment of Subjects With Advanced Cervical Cancer (FERMATA)                                        | Y |   | <a href="https://ClinicalTrials.gov/show/NCT03912415">https://ClinicalTrials.gov/show/NCT03912415</a> |
| Checkpoint inhibitor | Efficacy and Safety of First-line Anti-PD-1/PD-L1 Monoclonal Antibody in Combination With Chemotherapy and Bronchoscopy-assisted Interventional Therapy in Patients With Advanced Central Non-small Cell Lung Cancer                       | Y |   | <a href="https://ClinicalTrials.gov/show/NCT04702009">https://ClinicalTrials.gov/show/NCT04702009</a> |
| Checkpoint inhibitor | Efficacy and Safety of Lenvatinib (E7080/MK-7902) Plus Pembrolizumab (MK-3475) Plus Chemotherapy in Participants With Advanced/Metastatic Gastroesophageal Adenocarcinoma (MK-7902-015/E7080-G000-321/LEAP-015)                            | Y |   | <a href="https://ClinicalTrials.gov/show/NCT04662710">https://ClinicalTrials.gov/show/NCT04662710</a> |
| Checkpoint inhibitor | Efficacy and Safety of Pembrolizumab (MK-3475) Plus Lenvatinib (E7080/MK-7902) Plus Chemotherapy in Participants With Metastatic Esophageal Carcinoma (MK-7902-014/E7080-G000-320/LEAP-014)                                                | Y |   | <a href="https://ClinicalTrials.gov/show/NCT04949256">https://ClinicalTrials.gov/show/NCT04949256</a> |

|                      |                                                                                                                                                                                                                                                                                                            |   |   |                                                                                                       |
|----------------------|------------------------------------------------------------------------------------------------------------------------------------------------------------------------------------------------------------------------------------------------------------------------------------------------------------|---|---|-------------------------------------------------------------------------------------------------------|
| Checkpoint inhibitor | Efficacy and Safety of Pembrolizumab (MK-3475) With Lenvatinib (E7080/MK-7902) vs. Docetaxel in Participants With Metastatic Non-Small Cell Lung Cancer (NSCLC) and Progressive Disease (PD) After Platinum Doublet Chemotherapy and Immunotherapy (MK-7902-008/E7080-G000-316/LEAP-008)                   | Y |   | <a href="https://ClinicalTrials.gov/show/NCT03976375">https://ClinicalTrials.gov/show/NCT03976375</a> |
| Checkpoint inhibitor | Efficacy and Safety of Pembrolizumab Plus Investigational Agents in Combination With Chemotherapy as First-Line Treatment in Extensive-Stage Small Cell Lung Cancer (ES-SCLC) (MK-3475-B99/ KEYNOTE-B99)                                                                                                   | Y |   | <a href="https://ClinicalTrials.gov/show/NCT04924101">https://ClinicalTrials.gov/show/NCT04924101</a> |
| Checkpoint inhibitor | Efficacy and Safety of Perioperative Chemotherapy Plus PD-1 Antibody in Gastric Cancer                                                                                                                                                                                                                     | Y |   | <a href="https://ClinicalTrials.gov/show/NCT04367025">https://ClinicalTrials.gov/show/NCT04367025</a> |
| Checkpoint inhibitor | Efficacy and Safety of Platinum-based Chemotherapy + Bevacizumab + Durvalumab, and Salvage SBRT for IV Non-Small Cell Lung Cancer Patients With EGFR Mutations After Failure of First Line Osimertinib: A Multicenter, Prospective, Phase II Clinical Study                                                | Y |   | <a href="https://ClinicalTrials.gov/show/NCT04517526">https://ClinicalTrials.gov/show/NCT04517526</a> |
| Checkpoint inhibitor | Efficacy and Safety Study of First-line Treatment With Pembrolizumab (MK-3475) Plus Chemotherapy Versus Placebo Plus Chemotherapy in Women With Persistent, Recurrent, or Metastatic Cervical Cancer (MK-3475-826/KEYNOTE-826)                                                                             | Y |   | <a href="https://ClinicalTrials.gov/show/NCT03635567">https://ClinicalTrials.gov/show/NCT03635567</a> |
| Checkpoint inhibitor | Efficacy Comparison of Cobolimab + Dostarlimab + Docetaxel to Dostarlimab + Docetaxel to Docetaxel Alone in Participants With Advanced Non-Small Cell Lung Cancer Who Have Progressed on Prior Anti-Programmed Death-ligand 1 (PD-L1) Therapy and Chemotherapy                                             | Y |   | <a href="https://ClinicalTrials.gov/show/NCT04655976">https://ClinicalTrials.gov/show/NCT04655976</a> |
| Checkpoint inhibitor | Efficacy of Neoadjuvant PD-1 Blockade Plus Chemotherapy for Esophageal Squamous Cell Carcinoma                                                                                                                                                                                                             | Y |   | <a href="https://ClinicalTrials.gov/show/NCT04225364">https://ClinicalTrials.gov/show/NCT04225364</a> |
| Checkpoint inhibitor | Efficacy of PD-1 Blockade Plus Platinum-based Chemotherapy in Patients With EGFR Sensitive Mutated NSCLC                                                                                                                                                                                                   | Y |   | <a href="https://ClinicalTrials.gov/show/NCT05284539">https://ClinicalTrials.gov/show/NCT05284539</a> |
| Checkpoint inhibitor | Efficacy of Perioperative Chemotherapy Plus PD-1 Antibody in the Locally Advanced Gastric Cancer                                                                                                                                                                                                           | Y |   | <a href="https://ClinicalTrials.gov/show/NCT04250948">https://ClinicalTrials.gov/show/NCT04250948</a> |
| Checkpoint inhibitor | Envafoimab Plus Chemoradiotherapy for Locally Advanced NPC, a Prospective, Single Armed Phase II Trial.                                                                                                                                                                                                    | Y |   | <a href="https://ClinicalTrials.gov/show/NCT05397769">https://ClinicalTrials.gov/show/NCT05397769</a> |
| Checkpoint inhibitor | Exploration of Immunodynamic Monitoring in the Population Evaluation of Neoadjuvant Chemotherapy Immunotherapy in Patients With Solid Tumors of the Chest.                                                                                                                                                 | Y |   | <a href="https://ClinicalTrials.gov/show/NCT05044728">https://ClinicalTrials.gov/show/NCT05044728</a> |
| Checkpoint inhibitor | First-line Esophageal Carcinoma Study With Chemo vs. Chemo Plus Pembrolizumab (MK-3475-590/KEYNOTE-590)                                                                                                                                                                                                    | Y |   | <a href="https://ClinicalTrials.gov/show/NCT03189719">https://ClinicalTrials.gov/show/NCT03189719</a> |
| Checkpoint inhibitor | First-line Esophageal Carcinoma Study With Chemo vs. Chemo Plus Pembrolizumab (MK-3475-590/KEYNOTE-590)-China Extension Study                                                                                                                                                                              | Y |   | <a href="https://ClinicalTrials.gov/show/NCT03881111">https://ClinicalTrials.gov/show/NCT03881111</a> |
| Checkpoint inhibitor | Fuzoparib and Camrelizumab in Treating Patients With R/M NPC That Progressed After First-line Chemotherapy                                                                                                                                                                                                 | Y |   | <a href="https://ClinicalTrials.gov/show/NCT04978012">https://ClinicalTrials.gov/show/NCT04978012</a> |
| Checkpoint inhibitor | GP Chemotherapy in Combination With Anti-PD-1 and Anti-TIGIT in Unresectable Advanced BTC                                                                                                                                                                                                                  | Y |   | <a href="https://ClinicalTrials.gov/show/NCT05023109">https://ClinicalTrials.gov/show/NCT05023109</a> |
| Checkpoint inhibitor | GP Chemotherapy in Combination With Tislezumab and Ociperlimab as First-line Treatment in Advanced BTC                                                                                                                                                                                                     | Y |   | <a href="https://ClinicalTrials.gov/show/NCT05019677">https://ClinicalTrials.gov/show/NCT05019677</a> |
| Checkpoint inhibitor | GYNeological Cancers Treated With NETrin mAbs in Combination With Chemotherapy and/or Pembrolizumab                                                                                                                                                                                                        | Y |   | <a href="https://ClinicalTrials.gov/show/NCT04652076">https://ClinicalTrials.gov/show/NCT04652076</a> |
| Checkpoint inhibitor | Hepatic Artery Infusion Chemotherapy (HAIC) Plus Durvalumab for Advanced Hepatocellular Carcinoma                                                                                                                                                                                                          | Y |   | <a href="https://ClinicalTrials.gov/show/NCT04945720">https://ClinicalTrials.gov/show/NCT04945720</a> |
| Checkpoint inhibitor | HLX07+HLX10+Chemotherapy or HLX07 Monotherapy in Patients With Advanced Metastatic Gastric Cancer                                                                                                                                                                                                          | Y |   | <a href="https://ClinicalTrials.gov/show/NCT05246982">https://ClinicalTrials.gov/show/NCT05246982</a> |
| Checkpoint inhibitor | HMPL 453 (FGFR Inhibitor) in Combination With Chemotherapy or Anti-PD-1 Antibody in Advanced Solid Tumors                                                                                                                                                                                                  | Y |   | <a href="https://ClinicalTrials.gov/show/NCT05173142">https://ClinicalTrials.gov/show/NCT05173142</a> |
| Checkpoint inhibitor | HX008 Plus Chemotherapy VS Pembrolizumab Plus Chemotherapy As the First-line Treatment in Participants With Advanced or Metastatic Nonsquamous Non-small Cell Lung Cancer                                                                                                                                  | Y |   | <a href="https://ClinicalTrials.gov/show/NCT04750083">https://ClinicalTrials.gov/show/NCT04750083</a> |
| Checkpoint inhibitor | Immune Checkpoint Inhibition (Tremelimumab and/or MEDI4736) in Combination With Radiation Therapy in Patients With Unresectable Pancreatic Cancer                                                                                                                                                          |   | Y | <a href="https://ClinicalTrials.gov/show/NCT02311361">https://ClinicalTrials.gov/show/NCT02311361</a> |
| Checkpoint inhibitor | Immune Checkpoint Inhibitor PD-1 Antibody Combined With Chemotherapy in the Perioperative Treatment of Locally Advanced Resectable Gastric or Gastroesophageal Junction Adenocarcinoma                                                                                                                     | Y |   | <a href="https://ClinicalTrials.gov/show/NCT04908566">https://ClinicalTrials.gov/show/NCT04908566</a> |
| Checkpoint inhibitor | Immunotherapy for Recurrent Cervical Cancer Refractory to Platinum-based Chemotherapy                                                                                                                                                                                                                      | Y |   | <a href="https://ClinicalTrials.gov/show/NCT04188860">https://ClinicalTrials.gov/show/NCT04188860</a> |
| Checkpoint inhibitor | Immunotherapy for Recurrent Cervical Cancer Refractory to Platinum-based Chemotherapy: Multi-Center Trial                                                                                                                                                                                                  | Y |   | <a href="https://ClinicalTrials.gov/show/NCT05290935">https://ClinicalTrials.gov/show/NCT05290935</a> |
| Checkpoint inhibitor | Immunotherapy With Neo-adjuvant Chemotherapy for Ovarian Cancer                                                                                                                                                                                                                                            | Y |   | <a href="https://ClinicalTrials.gov/show/NCT03249142">https://ClinicalTrials.gov/show/NCT03249142</a> |
| Checkpoint inhibitor | Impact of eHealth Monitoring on Overall Survival in Patients With Metastatic NSCLC / Extensive-stage SCLC / Advanced TNBC Under First-line Treatment With Atezolizumab Plus Chemotherapy                                                                                                                   |   |   | <a href="https://ClinicalTrials.gov/show/NCT03911219">https://ClinicalTrials.gov/show/NCT03911219</a> |
| Checkpoint inhibitor | INCMA00012 in Combination With Chemoradiation in Participants With Stage III Non-Small Cell Lung Cancer (POD1UM-301)                                                                                                                                                                                       | Y | Y | <a href="https://ClinicalTrials.gov/show/NCT04203511">https://ClinicalTrials.gov/show/NCT04203511</a> |
| Checkpoint inhibitor | INCMA00012 Plus Chemotherapy in Participants With Advanced Solid Tumors (POD1UM-105)                                                                                                                                                                                                                       | Y |   | <a href="https://ClinicalTrials.gov/show/NCT03920839">https://ClinicalTrials.gov/show/NCT03920839</a> |
| Checkpoint inhibitor | Induction Chemotherapy and Toripalimab for Larynx Preservation in Resectable Laryngeal/Hypopharyngeal Carcinoma                                                                                                                                                                                            | Y |   | <a href="https://ClinicalTrials.gov/show/NCT04995120">https://ClinicalTrials.gov/show/NCT04995120</a> |
| Checkpoint inhibitor | Induction of Immune-mediated aBscOpal Effect through STEReotactic Radiation Therapy in Metastatic Melanoma Patients Treated by PD-1 + CTLA-4 Inhibitors (BOOSTER MELANOMA)                                                                                                                                 |   | Y | <a href="https://ClinicalTrials.gov/show/NCT03354962">https://ClinicalTrials.gov/show/NCT03354962</a> |
| Checkpoint inhibitor | IO102 With Pembrolizumab, With or Without Chemotherapy, as First-line Treatment of Metastatic NSCLC                                                                                                                                                                                                        | Y |   | <a href="https://ClinicalTrials.gov/show/NCT03562871">https://ClinicalTrials.gov/show/NCT03562871</a> |
| Checkpoint inhibitor | IO102 With Pembrolizumab, With or Without Chemotherapy, as First-line Treatment of Metastatic NSCLC                                                                                                                                                                                                        | Y |   | <a href="https://ClinicalTrials.gov/show/NCT03562871">https://ClinicalTrials.gov/show/NCT03562871</a> |
| Checkpoint inhibitor | Ipilimumab, Nivolumab, and Radiation Therapy in Treating Patients With HPV Positive Advanced Oropharyngeal Squamous Cell Carcinoma                                                                                                                                                                         |   | Y | <a href="https://ClinicalTrials.gov/show/NCT03799445">https://ClinicalTrials.gov/show/NCT03799445</a> |
| Checkpoint inhibitor | KEYMAKER-U01 Substudy 1: Efficacy and Safety Study of Pembrolizumab (MK-3475) Plus Chemotherapy When Used With Investigational Agents in Treatment-naïve Participants With Advanced Non-small Cell Lung Cancer (NSCLC) (MK-3475-01A/KEYMAKER-U01A)                                                         | Y |   | <a href="https://ClinicalTrials.gov/show/NCT04165070">https://ClinicalTrials.gov/show/NCT04165070</a> |
| Checkpoint inhibitor | KEYMAKER-U01 Umbrella Master Study: Studies of Investigational Agents With Either Pembrolizumab (MK-3475) Alone or With Pembrolizumab PLUS Chemotherapy in Participants With Advanced Non-small Cell Lung Cancer (NSCLC) (MK-3475-U01/KEYMAKER-U01)                                                        | Y |   | <a href="https://ClinicalTrials.gov/show/NCT04165798">https://ClinicalTrials.gov/show/NCT04165798</a> |
| Checkpoint inhibitor | Lenvatinib (E7080/MK-7902) in Combination With Pembrolizumab (MK-3475) vs. Standard Chemotherapy and Lenvatinib Monotherapy in Participants With Recurrent/Metastatic Head and Neck Squamous Cell Carcinoma That Progressed After Platinum Therapy and Immunotherapy (MK-7902-009/E7080-G000-228/LEAP-009) | Y |   | <a href="https://ClinicalTrials.gov/show/NCT04428151">https://ClinicalTrials.gov/show/NCT04428151</a> |
| Checkpoint inhibitor | Local Consolidative Therapy and Durvalumab for Oligoprogressive and Polyprogressive Stage III NSCLC After Chemoradiation and Anti-PD-L1 Therapy                                                                                                                                                            | Y | Y | <a href="https://ClinicalTrials.gov/show/NCT04892953">https://ClinicalTrials.gov/show/NCT04892953</a> |
| Checkpoint inhibitor | Localized Radiation Therapy or Recombinant Interferon Beta and Avelumab With or Without Cellular Adoptive Immunotherapy in Treating Patients With Metastatic Merkel Cell Carcinoma                                                                                                                         |   | Y | <a href="https://ClinicalTrials.gov/show/NCT02584829">https://ClinicalTrials.gov/show/NCT02584829</a> |
| Checkpoint inhibitor | LYT-200 Alone and in Combination With Chemotherapy or Anti-PD-1 in Patients With Metastatic Solid Tumors                                                                                                                                                                                                   | Y |   | <a href="https://ClinicalTrials.gov/show/NCT04666688">https://ClinicalTrials.gov/show/NCT04666688</a> |
| Checkpoint inhibitor | MPDL3280A With Chemoradiation for Lung Cancer                                                                                                                                                                                                                                                              | Y | Y | <a href="https://ClinicalTrials.gov/show/NCT02525757">https://ClinicalTrials.gov/show/NCT02525757</a> |
| Checkpoint inhibitor | Multi-agent Low Dose Chemotherapy GAX-CI Followed by Olaparib and Pembro in Metastatic Pancreatic Ductal Cancer.                                                                                                                                                                                           | Y |   | <a href="https://ClinicalTrials.gov/show/NCT04753879">https://ClinicalTrials.gov/show/NCT04753879</a> |
| Checkpoint inhibitor | Multi-omics Model Predicts Efficacy of Preoperative Neoadjuvant Chemoradiotherapy Combined PD-1 Antibody Therapy for Locally Advanced Rectal Cancer                                                                                                                                                        | Y |   | <a href="https://ClinicalTrials.gov/show/NCT05368051">https://ClinicalTrials.gov/show/NCT05368051</a> |
| Checkpoint inhibitor | NBTXR3, Radiation Therapy, and Pembrolizumab for the Treatment of Recurrent or Metastatic Head and Neck Squamous Cell Cancer                                                                                                                                                                               |   | Y | <a href="https://ClinicalTrials.gov/show/NCT04862455">https://ClinicalTrials.gov/show/NCT04862455</a> |
| Checkpoint inhibitor | NBTXR3, Radiation Therapy, Ipilimumab, and Nivolumab for the Treatment of Lung and/or Liver Metastases From Solid Malignancy                                                                                                                                                                               |   | Y | <a href="https://ClinicalTrials.gov/show/NCT05039632">https://ClinicalTrials.gov/show/NCT05039632</a> |
| Checkpoint inhibitor | Neoadjuvant Anti-PD-1 Antibody (Toripalimab) or Combined With Chemotherapy in HNSCC Patients                                                                                                                                                                                                               | Y |   | <a href="https://ClinicalTrials.gov/show/NCT04164238">https://ClinicalTrials.gov/show/NCT04164238</a> |
| Checkpoint inhibitor | Neoadjuvant Anti-PD-1 Antibody SHR-1210 and Radiation in Resectable Esophageal Squamous Cell Carcinoma                                                                                                                                                                                                     |   | Y | <a href="https://ClinicalTrials.gov/show/NCT03200691">https://ClinicalTrials.gov/show/NCT03200691</a> |
| Checkpoint inhibitor | Neoadjuvant Arterial Embolization Chemotherapy Combined PD-1 Inhibitor for Locally Advanced Rectal Cancer                                                                                                                                                                                                  | Y |   | <a href="https://ClinicalTrials.gov/show/NCT05420584">https://ClinicalTrials.gov/show/NCT05420584</a> |
| Checkpoint inhibitor | Neoadjuvant Camrelizumab Plus Chemotherapy in Triple Negative Breast Cancer                                                                                                                                                                                                                                | Y |   | <a href="https://ClinicalTrials.gov/show/NCT05088057">https://ClinicalTrials.gov/show/NCT05088057</a> |
| Checkpoint inhibitor | Neoadjuvant Chemoradiation Plus PD-1 Antibody(SHR-1210) in Locally Advanced Proximal Stomach Adenocarcinoma                                                                                                                                                                                                | Y | Y | <a href="https://ClinicalTrials.gov/show/NCT03631615">https://ClinicalTrials.gov/show/NCT03631615</a> |
| Checkpoint inhibitor | Neoadjuvant Chemoradiotherapy Combined With PD-1 Antibody in Locally Advanced Esophageal Cancer                                                                                                                                                                                                            | Y |   | <a href="https://ClinicalTrials.gov/show/NCT04177875">https://ClinicalTrials.gov/show/NCT04177875</a> |
| Checkpoint inhibitor | Neoadjuvant Chemoradiotherapy Plus Tislezumab Followed by TME for LARC.                                                                                                                                                                                                                                    | Y |   | <a href="https://ClinicalTrials.gov/show/NCT04911517">https://ClinicalTrials.gov/show/NCT04911517</a> |
| Checkpoint inhibitor | Neoadjuvant Durvalumab and Tremelimumab Plus Radiation for High Risk Soft-Tissue Sarcoma                                                                                                                                                                                                                   | Y |   | <a href="https://ClinicalTrials.gov/show/NCT03116529">https://ClinicalTrials.gov/show/NCT03116529</a> |
| Checkpoint inhibitor | Neoadjuvant Immunotherapy (PD-1 / PD-L1) Combined With Chemotherapy for Locally Advanced Thoracic Esophageal Squamous Cell Carcinoma: a Single Center, Prospective, Open, One Arm Exploratory Clinical Study                                                                                               | Y |   | <a href="https://ClinicalTrials.gov/show/NCT05028231">https://ClinicalTrials.gov/show/NCT05028231</a> |
| Checkpoint inhibitor | Neoadjuvant Immunotherapy and Chemotherapy Followed by Surgery in Unresectable Stage NSCLC                                                                                                                                                                                                                 | Y |   | <a href="https://ClinicalTrials.gov/show/NCT04943029">https://ClinicalTrials.gov/show/NCT04943029</a> |
| Checkpoint inhibitor | Neoadjuvant Immunotherapy With Durvalumab (MEDI4736) in Non-Surgical Early Stage or Locally Advanced Non-Small Cell Lung Cancer (NSCLC) Followed by Radical Radiotherapy or Chemoradiotherapy                                                                                                              | Y |   | <a href="https://ClinicalTrials.gov/show/NCT05267392">https://ClinicalTrials.gov/show/NCT05267392</a> |



|                      |                                                                                                                                                                                                                                                                                              |   |   |                                                                                                       |
|----------------------|----------------------------------------------------------------------------------------------------------------------------------------------------------------------------------------------------------------------------------------------------------------------------------------------|---|---|-------------------------------------------------------------------------------------------------------|
| Checkpoint inhibitor | Neoadjuvant PD-1 Antibody Plus Apatinib or Chemotherapy for Non-small Cell Lung Cancer                                                                                                                                                                                                       | Y |   | <a href="https://ClinicalTrials.gov/show/NCT04379739">https://ClinicalTrials.gov/show/NCT04379739</a> |
| Checkpoint inhibitor | Neoadjuvant PD-1 Antibody Plus Chemotherapy in Resectable Stage IIIA-N2 Non-Small-Cell Lung Cancer                                                                                                                                                                                           | Y |   | <a href="https://ClinicalTrials.gov/show/NCT04422392">https://ClinicalTrials.gov/show/NCT04422392</a> |
| Checkpoint inhibitor | Neoadjuvant PD-1 Blockade Combined With Chemotherapy Followed by Concurrent Immunoradiotherapy for Locally Advanced Anal Canal Squamous Carcinoma Patients                                                                                                                                   | Y |   | <a href="https://ClinicalTrials.gov/show/NCT05060471">https://ClinicalTrials.gov/show/NCT05060471</a> |
| Checkpoint inhibitor | Neoadjuvant PD-1 Inhibitor, Apatinib Combined With Chemotherapy in Resectable Stage IIIA-IB NSCLC                                                                                                                                                                                            | Y |   | <a href="https://ClinicalTrials.gov/show/NCT05400070">https://ClinicalTrials.gov/show/NCT05400070</a> |
| Checkpoint inhibitor | Neoadjuvant PD-1 Monoclonal Antibody Plus Cisplatin-based Chemotherapy in Locally Advanced Upper Tract Urothelial Carcinoma                                                                                                                                                                  | Y |   | <a href="https://ClinicalTrials.gov/show/NCT04672317">https://ClinicalTrials.gov/show/NCT04672317</a> |
| Checkpoint inhibitor | Neoadjuvant Sintilimab Combined With Reduction of Cycles of Chemotherapy in Resectable Oral Cavity or Oropharyngeal Squamous Cell Carcinoma (OOC-002)                                                                                                                                        | Y |   | <a href="https://ClinicalTrials.gov/show/NCT05098119">https://ClinicalTrials.gov/show/NCT05098119</a> |
| Checkpoint inhibitor | Neoadjuvant Study of Camrelizumab Plus Chemotherapy in Triple Negative Breast Cancer (TNBC)                                                                                                                                                                                                  | Y |   | <a href="https://ClinicalTrials.gov/show/NCT04676997">https://ClinicalTrials.gov/show/NCT04676997</a> |
| Checkpoint inhibitor | Neoadjuvant Toripalimab Combined With Chemotherapy in the Treatment of Malignant Pleural Mesothelioma                                                                                                                                                                                        | Y |   | <a href="https://ClinicalTrials.gov/show/NCT04713761">https://ClinicalTrials.gov/show/NCT04713761</a> |
| Checkpoint inhibitor | Nivolumab and Epacadostat With Platinum Doublet Chemotherapy Versus Platinum Doublet Chemotherapy in Non-Small Cell Lung Cancer                                                                                                                                                              | Y |   | <a href="https://ClinicalTrials.gov/show/NCT03348904">https://ClinicalTrials.gov/show/NCT03348904</a> |
| Checkpoint inhibitor | Nivolumab and Ipilimumab in Combination With Immunogenic Chemotherapy for Patients With Advanced NSCLC                                                                                                                                                                                       | Y |   | <a href="https://ClinicalTrials.gov/show/NCT04043195">https://ClinicalTrials.gov/show/NCT04043195</a> |
| Checkpoint inhibitor | Nivolumab Combination With Standard First-line Chemotherapy and Radiotherapy in Locally Advanced Stage IIIA/B Non-Small Cell Lung Carcinoma                                                                                                                                                  | Y |   | <a href="https://ClinicalTrials.gov/show/NCT02434081">https://ClinicalTrials.gov/show/NCT02434081</a> |
| Checkpoint inhibitor | Nivolumab in Combination With Chemotherapy Pre-Surgery in Treating Patients With Borderline Resectable Pancreatic Cancer                                                                                                                                                                     | Y |   | <a href="https://ClinicalTrials.gov/show/NCT03970252">https://ClinicalTrials.gov/show/NCT03970252</a> |
| Checkpoint inhibitor | Nivolumab in Combination With Metronomic Chemotherapy in Paediatrics Refractory / Relapsing Solid Tumors                                                                                                                                                                                     | Y |   | <a href="https://ClinicalTrials.gov/show/NCT03585465">https://ClinicalTrials.gov/show/NCT03585465</a> |
| Checkpoint inhibitor | Nivolumab Plus Epacadostat in Combination With Chemotherapy Versus the EXTREME Regimen in Squamous Cell Carcinoma of the Head and Neck (CheckMate 9NA/ECHO-310)                                                                                                                              | Y |   | <a href="https://ClinicalTrials.gov/show/NCT03342352">https://ClinicalTrials.gov/show/NCT03342352</a> |
| Checkpoint inhibitor | Nivolumab With Radiation Therapy and Bevacizumab for Recurrent MGMT Methylated Glioblastoma                                                                                                                                                                                                  |   | Y | <a href="https://ClinicalTrials.gov/show/NCT03743662">https://ClinicalTrials.gov/show/NCT03743662</a> |
| Checkpoint inhibitor | Ociperlimab With Tislelizumab and Chemotherapy in Patients With Untreated Metastatic Non-Small Cell Lung Cancer                                                                                                                                                                              | Y |   | <a href="https://ClinicalTrials.gov/show/NCT05014815">https://ClinicalTrials.gov/show/NCT05014815</a> |
| Checkpoint inhibitor | Optimal Sequencing of Pembrolizumab (MK-3475) and Standard Platinum-based Chemotherapy in First-Line NSCLC                                                                                                                                                                                   | Y |   | <a href="https://ClinicalTrials.gov/show/NCT02591615">https://ClinicalTrials.gov/show/NCT02591615</a> |
| Checkpoint inhibitor | PD-1 Antibody Combined Neoadjuvant Chemotherapy for Locally Advanced Cervical Cancer                                                                                                                                                                                                         | Y |   | <a href="https://ClinicalTrials.gov/show/NCT04516616">https://ClinicalTrials.gov/show/NCT04516616</a> |
| Checkpoint inhibitor | PD-1 Antibody Combined Neoadjuvant Chemotherapy for Ovarian Cancer                                                                                                                                                                                                                           | Y |   | <a href="https://ClinicalTrials.gov/show/NCT04815408">https://ClinicalTrials.gov/show/NCT04815408</a> |
| Checkpoint inhibitor | PD-1 Antibody Combined With Chemoradiotherapy in Recurrent Nasopharyngeal Carcinoma Patients                                                                                                                                                                                                 | Y |   | <a href="https://ClinicalTrials.gov/show/NCT03907826">https://ClinicalTrials.gov/show/NCT03907826</a> |
| Checkpoint inhibitor | PD-1 Antibody Following Preoperative Chemoradiotherapy for Locally Advanced pMMR/MSS Rectal Cancer                                                                                                                                                                                           | Y |   | <a href="https://ClinicalTrials.gov/show/NCT04833387">https://ClinicalTrials.gov/show/NCT04833387</a> |
| Checkpoint inhibitor | PD-1 Antibody Plus Chemoradiotherapy for IB2-IB3 Cervical Cancer                                                                                                                                                                                                                             | Y |   | <a href="https://ClinicalTrials.gov/show/NCT05311566">https://ClinicalTrials.gov/show/NCT05311566</a> |
| Checkpoint inhibitor | PD-1 Antibody Plus Chemotherapy for TKI Failure Driver Gene Mutation Positive Advanced NSCLC                                                                                                                                                                                                 | Y |   | <a href="https://ClinicalTrials.gov/show/NCT04322890">https://ClinicalTrials.gov/show/NCT04322890</a> |
| Checkpoint inhibitor | PD-1 Antibody Versus Best Supportive Care After Chemoradiation in Locoregionally Advanced Nasopharyngeal Carcinoma                                                                                                                                                                           | Y | Y | <a href="https://ClinicalTrials.gov/show/NCT03427827">https://ClinicalTrials.gov/show/NCT03427827</a> |
| Checkpoint inhibitor | PD-1 Blockade Combined With De-intensification Radical Chemoradiotherapy in Nasopharyngeal Carcinoma                                                                                                                                                                                         | Y |   | <a href="https://ClinicalTrials.gov/show/NCT04907370">https://ClinicalTrials.gov/show/NCT04907370</a> |
| Checkpoint inhibitor | PD-1 Blockade Combined With Definitive Chemoradiation in Locoregionally-advanced Nasopharyngeal Carcinoma                                                                                                                                                                                    | Y | Y | <a href="https://ClinicalTrials.gov/show/NCT03619824">https://ClinicalTrials.gov/show/NCT03619824</a> |
| Checkpoint inhibitor | PD-1 Blockade With JS001 Plus Neoadjuvant Chemotherapy for Gastric/Gastroesophageal Junction Cancer                                                                                                                                                                                          | Y |   | <a href="https://ClinicalTrials.gov/show/NCT05033392">https://ClinicalTrials.gov/show/NCT05033392</a> |
| Checkpoint inhibitor | PD-1 Combined With Pyrotinib for Chemotherapy Failure HER2 Insertion Mutation Advanced NSCLC                                                                                                                                                                                                 | Y |   | <a href="https://ClinicalTrials.gov/show/NCT04144569">https://ClinicalTrials.gov/show/NCT04144569</a> |
| Checkpoint inhibitor | PD-1 Immune Checkpoint Inhibitor Combined With Bevacizumab for Patients With Recurrent/Metastatic Nasopharyngeal Carcinoma After Failure of First Line Chemotherapy                                                                                                                          | Y |   | <a href="https://ClinicalTrials.gov/show/NCT04872582">https://ClinicalTrials.gov/show/NCT04872582</a> |
| Checkpoint inhibitor | PD-1 Inhibitor and Chemotherapy With Concurrent Irradiation at Varied Tumour Sites in Advanced Non-small Cell Lung Cancer                                                                                                                                                                    | Y | Y | <a href="https://ClinicalTrials.gov/show/NCT03774732">https://ClinicalTrials.gov/show/NCT03774732</a> |
| Checkpoint inhibitor | PD-1 Inhibitor Combined With Neoadjuvant Chemoradiotherapy Plus Surgery for Locally Advanced ESCC                                                                                                                                                                                            | Y |   | <a href="https://ClinicalTrials.gov/show/NCT05357846">https://ClinicalTrials.gov/show/NCT05357846</a> |
| Checkpoint inhibitor | PD-1 Inhibitor Combined With Neoadjuvant Chemotherapy in Subjects With Resectable Locally Advanced Thoracic Esophageal Squamous Cell Carcinoma                                                                                                                                               | Y |   | <a href="https://ClinicalTrials.gov/show/NCT05007145">https://ClinicalTrials.gov/show/NCT05007145</a> |
| Checkpoint inhibitor | PD-1 Inhibitor Concurrent With Chemotherapy as Neoadjuvant Therapy for TNBC                                                                                                                                                                                                                  | Y |   | <a href="https://ClinicalTrials.gov/show/NCT04809779">https://ClinicalTrials.gov/show/NCT04809779</a> |
| Checkpoint inhibitor | PD-1 PET Imaging During Neoadjuvant (Chemo)Radiotherapy in Esophageal and Rectal Cancer                                                                                                                                                                                                      | Y |   | <a href="https://ClinicalTrials.gov/show/NCT04564482">https://ClinicalTrials.gov/show/NCT04564482</a> |
| Checkpoint inhibitor | PD1 Antibody Sintilimab Chemoradiotherapy for Locally Advanced Rectal Cancer                                                                                                                                                                                                                 |   |   | <a href="https://ClinicalTrials.gov/show/NCT04304209">https://ClinicalTrials.gov/show/NCT04304209</a> |
| Checkpoint inhibitor | PD1 Antibody Toripalimab and Chemoradiotherapy for dMMR/MSI-H Locally Advanced Colorectal Cancer                                                                                                                                                                                             | Y |   | <a href="https://ClinicalTrials.gov/show/NCT04301557">https://ClinicalTrials.gov/show/NCT04301557</a> |
| Checkpoint inhibitor | PD1 Combined With Chemotherapy for Adjuvant Treatment of Gastric Cancer                                                                                                                                                                                                                      | Y |   | <a href="https://ClinicalTrials.gov/show/NCT05180734">https://ClinicalTrials.gov/show/NCT05180734</a> |
| Checkpoint inhibitor | PD001 in Combination With Platinum-doublet Chemotherapy and Other Immunology Agents in PD-L1 Unselected, Metastatic NSCLC Patients                                                                                                                                                           | Y |   | <a href="https://ClinicalTrials.gov/show/NCT03064854">https://ClinicalTrials.gov/show/NCT03064854</a> |
| Checkpoint inhibitor | Pembrolizumab (MK-3475) Plus Chemotherapy Versus Placebo Plus Chemotherapy in Participants Gastric or Gastroesophageal Junction (GEJ) Adenocarcinoma (MK-3475-859/KEYNOTE-859)                                                                                                               | Y |   | <a href="https://ClinicalTrials.gov/show/NCT03675737">https://ClinicalTrials.gov/show/NCT03675737</a> |
| Checkpoint inhibitor | Pembrolizumab (MK-3475) Plus Chemotherapy Versus Placebo Plus Chemotherapy in Participants Gastric or Gastroesophageal Junction (GEJ) Adenocarcinoma (MK-3475-859/KEYNOTE-859)-China Extension                                                                                               | Y |   | <a href="https://ClinicalTrials.gov/show/NCT04859582">https://ClinicalTrials.gov/show/NCT04859582</a> |
| Checkpoint inhibitor | Pembrolizumab (MK-3475) Versus Placebo Following Surgery and Radiation in Participants With Locally Advanced Cutaneous Squamous Cell Carcinoma (MK-3475-630/KEYNOTE-630)                                                                                                                     |   | Y | <a href="https://ClinicalTrials.gov/show/NCT03833167">https://ClinicalTrials.gov/show/NCT03833167</a> |
| Checkpoint inhibitor | Pembrolizumab + Platinum Doublets Without Radiation for Programmed Death-ligand 1 (PD-L1) 50% Locally Advanced NSCLC                                                                                                                                                                         |   | Y | <a href="https://ClinicalTrials.gov/show/NCT04153734">https://ClinicalTrials.gov/show/NCT04153734</a> |
| Checkpoint inhibitor | Pembrolizumab Combined With Chemoradiotherapy in Squamous Cell Carcinoma of the Head and Neck                                                                                                                                                                                                | Y |   | <a href="https://ClinicalTrials.gov/show/NCT02819752">https://ClinicalTrials.gov/show/NCT02819752</a> |
| Checkpoint inhibitor | Pembrolizumab in Combination With Decitabine and Hypofractionated Index Lesion Radiation in Pediatrics and Young Adults                                                                                                                                                                      |   | Y | <a href="https://ClinicalTrials.gov/show/NCT03445858">https://ClinicalTrials.gov/show/NCT03445858</a> |
| Checkpoint inhibitor | Pembrolizumab in Treating Patients With Hormone Receptor Positive, Localized Inflammatory Breast Cancer Who Are Receiving Hormone Therapy and Did Not Achieve a Pathological Complete Response to Chemotherapy                                                                               | Y |   | <a href="https://ClinicalTrials.gov/show/NCT02971748">https://ClinicalTrials.gov/show/NCT02971748</a> |
| Checkpoint inhibitor | Pembrolizumab Plus Chemo in Neoadjuvant Treatment of Esophageal Squamous Cell Carcinoma                                                                                                                                                                                                      | Y |   | <a href="https://ClinicalTrials.gov/show/NCT05281003">https://ClinicalTrials.gov/show/NCT05281003</a> |
| Checkpoint inhibitor | Pembrolizumab versus chemotherapy and pembrolizumab in Non-small-cell Lung Cancers (NSCLC) With PDL1 50 %                                                                                                                                                                                    | Y |   | <a href="https://ClinicalTrials.gov/show/NCT04547504">https://ClinicalTrials.gov/show/NCT04547504</a> |
| Checkpoint inhibitor | Pembrolizumab With Chemotherapy for Poorly Chemo-responsive Thyroid and Salivary Gland Tumors                                                                                                                                                                                                | Y |   | <a href="https://ClinicalTrials.gov/show/NCT03360890">https://ClinicalTrials.gov/show/NCT03360890</a> |
| Checkpoint inhibitor | Pembrolizumab With Chemotherapy in Front Line Advanced Ovarian, Primary Peritoneal and Fallopian Tube Cancer                                                                                                                                                                                 | Y |   | <a href="https://ClinicalTrials.gov/show/NCT03410784">https://ClinicalTrials.gov/show/NCT03410784</a> |
| Checkpoint inhibitor | Pembrolizumab, Paclitaxel, Carboplatin, and Radiation Therapy in Treating Patients With Stage II-IIIb Non-Small Cell Lung Cancer                                                                                                                                                             |   | Y | <a href="https://ClinicalTrials.gov/show/NCT02621398">https://ClinicalTrials.gov/show/NCT02621398</a> |
| Checkpoint inhibitor | Pembrolizumab/Placebo Plus Trastuzumab Plus Chemotherapy in Human Epidermal Growth Factor Receptor 2 Positive (HER2+) Advanced Gastric or Gastroesophageal Junction (GEJ) Adenocarcinoma (MK-3475-811/KEYNOTE-811)                                                                           | Y |   | <a href="https://ClinicalTrials.gov/show/NCT03615326">https://ClinicalTrials.gov/show/NCT03615326</a> |
| Checkpoint inhibitor | Pembrolizumab/Vibostolimab Coformulation (MK-7684A) or Pembrolizumab/Vibostolimab Coformulation Plus Docetaxel Versus Docetaxel for Metastatic Non Small Cell Lung Cancer (NSCLC) With Progressive Disease After Platinum Doublet Chemotherapy and Immunotherapy (MK-7684A-002, KEYVIBE-002) | Y |   | <a href="https://ClinicalTrials.gov/show/NCT04725188">https://ClinicalTrials.gov/show/NCT04725188</a> |
| Checkpoint inhibitor | Penpulimab Plus Chemotherapy With/Without Apatinib for Patients With Advanced Esophageal Squamous Cell Carcinoma                                                                                                                                                                             | Y |   | <a href="https://ClinicalTrials.gov/show/NCT05214222">https://ClinicalTrials.gov/show/NCT05214222</a> |
| Checkpoint inhibitor | Perioperative Chemotherapy With/Without Preoperative Chemoradiation for Locally Advanced Gastric Cancer                                                                                                                                                                                      | Y | Y | <a href="https://ClinicalTrials.gov/show/NCT05161572">https://ClinicalTrials.gov/show/NCT05161572</a> |
| Checkpoint inhibitor | Perioperative Enfortumab Vedotin (EV) Plus Pembrolizumab (MK-3475) Versus Neoadjuvant Chemotherapy for Cisplatin-eligible Muscle Invasive Bladder Cancer (MIBC) (MK-3475-B15/ KEYNOTE-B15/ EV-304)                                                                                           | Y |   | <a href="https://ClinicalTrials.gov/show/NCT04700124">https://ClinicalTrials.gov/show/NCT04700124</a> |
| Checkpoint inhibitor | Perioperative Pembrolizumab (MK-3475) Plus Neoadjuvant Chemotherapy Versus Perioperative Placebo Plus Neoadjuvant Chemotherapy for Cisplatin-eligible Muscle-invasive Bladder Cancer (MIBC) (MK-3475-866/KEYNOTE-866)                                                                        | Y |   | <a href="https://ClinicalTrials.gov/show/NCT03924856">https://ClinicalTrials.gov/show/NCT03924856</a> |
| Checkpoint inhibitor | Phase 1 Study of Tremelimumab, Durvalumab, High-dose Chemotherapy, + Autologous Stem Cell Transplant                                                                                                                                                                                         | Y |   | <a href="https://ClinicalTrials.gov/show/NCT02716805">https://ClinicalTrials.gov/show/NCT02716805</a> |
| Checkpoint inhibitor | Phase 2 Study to Evaluate PVX-410 + Pembrolizumab + Chemotherapy for Metastatic, PD-L1 + Triple-Negative Breast Cancer                                                                                                                                                                       | Y |   | <a href="https://ClinicalTrials.gov/show/NCT04634747">https://ClinicalTrials.gov/show/NCT04634747</a> |
| Checkpoint inhibitor | Phase 2 Trial for Chemo-Resistant Gestational Trophoblastic Neoplasias With Pembrolizumab (CR-GTP)                                                                                                                                                                                           | Y |   | <a href="https://ClinicalTrials.gov/show/NCT04303884">https://ClinicalTrials.gov/show/NCT04303884</a> |

|                      |                                                                                                                                                                                                                                                                                             |   |   |                                                                                                       |
|----------------------|---------------------------------------------------------------------------------------------------------------------------------------------------------------------------------------------------------------------------------------------------------------------------------------------|---|---|-------------------------------------------------------------------------------------------------------|
| Checkpoint inhibitor | Phase II MEDI4736 in Combination With Chemotherapy for First-Line Treatment of Unresectable Mesothelioma                                                                                                                                                                                    | Y |   | <a href="https://ClinicalTrials.gov/show/NCT02899195">https://ClinicalTrials.gov/show/NCT02899195</a> |
| Checkpoint inhibitor | Phase II Study of the Effects of Laparoscopic Hyperthermic Intraperitoneal Chemotherapy (HIPEC) in Patients With Advanced Gastric Cancer                                                                                                                                                    | Y |   | <a href="https://ClinicalTrials.gov/show/NCT04107077">https://ClinicalTrials.gov/show/NCT04107077</a> |
| Checkpoint inhibitor | Phase II, Multi-center, Open-label, Randomized Trial on Efficacy and Safety of Neoadjuvant Long-course Chemoradiation Plus Tislelizumab in Mid-low Locally Advanced Rectal Cancer                                                                                                           | Y | Y | <a href="https://ClinicalTrials.gov/show/NCT05245474">https://ClinicalTrials.gov/show/NCT05245474</a> |
| Checkpoint inhibitor | Phase III Study of Camrelizumab in Combination With Chemotherapy in Recurrent/Metastatic Nasopharyngeal Carcinoma                                                                                                                                                                           | Y |   | <a href="https://ClinicalTrials.gov/show/NCT03707509">https://ClinicalTrials.gov/show/NCT03707509</a> |
| Checkpoint inhibitor | Phase III Study to Determine the Efficacy of Durvalumab in Combination With Chemotherapy in Completely Resected Stage II-III Non-small Cell Lung Cancer (NSCLC)                                                                                                                             | Y |   | <a href="https://ClinicalTrials.gov/show/NCT04385368">https://ClinicalTrials.gov/show/NCT04385368</a> |
| Checkpoint inhibitor | Phase-II Trial of Induction Chemotherapy and Chemoradiotherapy Plus/Minus Durvalumab and Consolidation Immunotherapy in Patients With Resectable Stage III NSCLC.                                                                                                                           | Y |   | <a href="https://ClinicalTrials.gov/show/NCT04202809">https://ClinicalTrials.gov/show/NCT04202809</a> |
| Checkpoint inhibitor | PHOENIX DDR/Anf-PD-L1 Trial: A Pre-surgical Window of Opportunity and Post-surgical Adjuvant Biomarker Study of DNA Damage Response Inhibition and/or Anf-PD-L1 Immunotherapy in Patients With Neoadjuvant Chemotherapy Resistant Residual Triple Negative Breast Cancer                    | Y |   | <a href="https://ClinicalTrials.gov/show/NCT03740893">https://ClinicalTrials.gov/show/NCT03740893</a> |
| Checkpoint inhibitor | Placebo-controlled, Study of Concurrent Chemoradiation Therapy With Pembrolizumab Followed by Pembrolizumab and Olaparib in Newly Diagnosed Treatment-Naive Limited-Stage Small Cell Lung Cancer (LS-SCLC) (MK 7339-013/KEYLYNK-013)                                                        | Y | Y | <a href="https://ClinicalTrials.gov/show/NCT04624204">https://ClinicalTrials.gov/show/NCT04624204</a> |
| Checkpoint inhibitor | Platinum-Based Chemotherapy Plus Ramucirumab in Patients With Advanced NSCLC Who Have Progressed on First Line Anti-PD-1 Immunotherapy                                                                                                                                                      | Y |   | <a href="https://ClinicalTrials.gov/show/NCT03904108">https://ClinicalTrials.gov/show/NCT03904108</a> |
| Checkpoint inhibitor | Platinum-Based Chemotherapy With/Without INCMGA00012, an Anti-PD-1 Antibody, in Non-Small Cell Lung Cancer                                                                                                                                                                                  | Y |   | <a href="https://ClinicalTrials.gov/show/NCT04205812">https://ClinicalTrials.gov/show/NCT04205812</a> |
| Checkpoint inhibitor | Pinabulin in Combination With Radiation/Immunotherapy in Patients With Select Advanced Cancers After Progression on PD-1 or PD-L1 Targeted Antibodies                                                                                                                                       |   | Y | <a href="https://ClinicalTrials.gov/show/NCT04902040">https://ClinicalTrials.gov/show/NCT04902040</a> |
| Checkpoint inhibitor | Pre-Operative Pembrolizumab + Chemoradiation in Patients With Locally Advanced Esophageal Squamous Cell Carcinoma                                                                                                                                                                           | Y | Y | <a href="https://ClinicalTrials.gov/show/NCT04435197">https://ClinicalTrials.gov/show/NCT04435197</a> |
| Checkpoint inhibitor | Precision Radiation of Immune Checkpoint Therapy Resistant Melanoma Metastases                                                                                                                                                                                                              |   | Y | <a href="https://ClinicalTrials.gov/show/NCT04793737">https://ClinicalTrials.gov/show/NCT04793737</a> |
| Checkpoint inhibitor | Preoperative Anti-PD-1 Antibody Combined With Chemoradiotherapy for Locally Advanced Squamous Cell Carcinoma of Esophagus                                                                                                                                                                   | Y |   | <a href="https://ClinicalTrials.gov/show/NCT03792347">https://ClinicalTrials.gov/show/NCT03792347</a> |
| Checkpoint inhibitor | Programmed Death Ligand (PD-L1) Combined With Chemotherapy for Patients With BTC                                                                                                                                                                                                            | Y |   | <a href="https://ClinicalTrials.gov/show/NCT03478488">https://ClinicalTrials.gov/show/NCT03478488</a> |
| Checkpoint inhibitor | Programmed Death-1 (PD-1) Antibody Combined With Chemoradiotherapy in High-risk Recurrent Nasopharyngeal Carcinoma                                                                                                                                                                          | Y |   | <a href="https://ClinicalTrials.gov/show/NCT03930498">https://ClinicalTrials.gov/show/NCT03930498</a> |
| Checkpoint inhibitor | QUILT-3.046: NANT Melanoma Vaccine: Combination Immunotherapy in Subjects With Melanoma Who Have Progressed On or After Chemotherapy and PD-1/PD-L1 Therapy                                                                                                                                 | Y |   | <a href="https://ClinicalTrials.gov/show/NCT03167177">https://ClinicalTrials.gov/show/NCT03167177</a> |
| Checkpoint inhibitor | QUILT-3.047: NANT Head and Neck Squamous Cell Carcinoma (HNSCC) Vaccine: Combination Immunotherapy in Subjects With HNSCC Who Have Progressed on or After Chemotherapy and PD-1/PD-L1 Therapy                                                                                               | Y |   | <a href="https://ClinicalTrials.gov/show/NCT03169764">https://ClinicalTrials.gov/show/NCT03169764</a> |
| Checkpoint inhibitor | QUILT-3.048: NANT Urothelial Cancer Vaccine: Combination Immunotherapy in Subjects With Urothelial Cancer Who Have Progressed on or After Chemotherapy and PD-1/PD-L1 Therapy                                                                                                               | Y |   | <a href="https://ClinicalTrials.gov/show/NCT03197571">https://ClinicalTrials.gov/show/NCT03197571</a> |
| Checkpoint inhibitor | Radiation Therapy and Durvalumab With or Without Tremelimumab in Treating Participants With Unresectable, Locally Advanced, or Metastatic Bladder Cancer                                                                                                                                    |   | Y | <a href="https://ClinicalTrials.gov/show/NCT03601455">https://ClinicalTrials.gov/show/NCT03601455</a> |
| Checkpoint inhibitor | Radiation Therapy and Durvalumab, With or Without Tremelimumab, in Patients With Bladder Cancer                                                                                                                                                                                             |   | Y | <a href="https://ClinicalTrials.gov/show/NCT03150836">https://ClinicalTrials.gov/show/NCT03150836</a> |
| Checkpoint inhibitor | Radiation, Immunotherapy and PARP Inhibitor in Triple Negative Breast Cancer                                                                                                                                                                                                                |   | Y | <a href="https://ClinicalTrials.gov/show/NCT04837209">https://ClinicalTrials.gov/show/NCT04837209</a> |
| Checkpoint inhibitor | Radiochemotherapy +/- Durvalumab for Locally-advanced Anal Carcinoma. A Multicenter, Randomized, Phase II Trial of the German Anal Cancer Study Group                                                                                                                                       | Y |   | <a href="https://ClinicalTrials.gov/show/NCT04230759">https://ClinicalTrials.gov/show/NCT04230759</a> |
| Checkpoint inhibitor | Radiotherapy in Combo With Chemo and Immunotherapy in Patients With PD-L1 Positive Metastatic TNBC                                                                                                                                                                                          | Y |   | <a href="https://ClinicalTrials.gov/show/NCT05233696">https://ClinicalTrials.gov/show/NCT05233696</a> |
| Checkpoint inhibitor | RADVAX: A Trial of Combined Pembrolizumab and Hypofractionated Radiation in Patients With Advanced Urothelial Cancer Who Have Progressed on Anti-PD-1/PD-L1 Monotherapy                                                                                                                     |   | Y | <a href="https://ClinicalTrials.gov/show/NCT02880345">https://ClinicalTrials.gov/show/NCT02880345</a> |
| Checkpoint inhibitor | Randomized Phase II Trial of a PD-1 Inhibitor INCMGA00012 as Consolidation Therapy After Definitive Concurrent Chemoradiotherapy (RHAPSODY)                                                                                                                                                 | Y |   | <a href="https://ClinicalTrials.gov/show/NCT04494009">https://ClinicalTrials.gov/show/NCT04494009</a> |
| Checkpoint inhibitor | Real World Evidence of PD-L1, TMB Prevalence and Efficacy of 1st Line Chemotherapy in These High or Low Population for Stage IV Urothelial Cancer                                                                                                                                           | Y |   | <a href="https://ClinicalTrials.gov/show/NCT04052113">https://ClinicalTrials.gov/show/NCT04052113</a> |
| Checkpoint inhibitor | Real-world Experience of ICIs Plus Chemotherapy for Advanced ESCC.                                                                                                                                                                                                                          | Y |   | <a href="https://ClinicalTrials.gov/show/NCT05142709">https://ClinicalTrials.gov/show/NCT05142709</a> |
| Checkpoint inhibitor | Rectal Artery Infusion Chemotherapy Combined With Anti-PD1 Antibody for MSS LARC                                                                                                                                                                                                            | Y |   | <a href="https://ClinicalTrials.gov/show/NCT05307198">https://ClinicalTrials.gov/show/NCT05307198</a> |
| Checkpoint inhibitor | REGN2810 (Anti-PD-1 Antibody), Platinum-based Doublet Chemotherapy, and Ipilimumab (Anti-CTLA-4 Antibody) Versus Pembrolizumab Monotherapy in Patients With Lung Cancer                                                                                                                     | Y |   | <a href="https://ClinicalTrials.gov/show/NCT03515629">https://ClinicalTrials.gov/show/NCT03515629</a> |
| Checkpoint inhibitor | Reirradiation and Programmed Cell Death Protein 1 (PD-1) Blockade On Recurrent Squamous Cell Head and Neck Tumors                                                                                                                                                                           |   | Y | <a href="https://ClinicalTrials.gov/show/NCT03317327">https://ClinicalTrials.gov/show/NCT03317327</a> |
| Checkpoint inhibitor | Reirradiation With Pembrolizumab in Locoregional Inoperable Recurrence or Second Primary Squamous Cell CA of the Head and Neck                                                                                                                                                              | Y |   | <a href="https://ClinicalTrials.gov/show/NCT02289209">https://ClinicalTrials.gov/show/NCT02289209</a> |
| Checkpoint inhibitor | Safety and Efficacy of Atezolizumab Combined to Preoperative Radio-chemotherapy in Localized Rectal Cancer                                                                                                                                                                                  | Y |   | <a href="https://ClinicalTrials.gov/show/NCT03127007">https://ClinicalTrials.gov/show/NCT03127007</a> |
| Checkpoint inhibitor | Safety and Efficacy of Durvalumab Combined to Neoadjuvant Chemotherapy in Localized Luminal B HER2(-) and Triple Negative Breast Cancer.                                                                                                                                                    | Y |   | <a href="https://ClinicalTrials.gov/show/NCT03356860">https://ClinicalTrials.gov/show/NCT03356860</a> |
| Checkpoint inhibitor | Safety and Efficacy of Lenvatinib (E7080/MK-7902) With Pembrolizumab (MK-3475) in Combination With Transarterial Chemoembolization (TACE) in Participants With Incurable/Non-metastatic Hepatocellular Carcinoma (MK-7902-012/E7080-G000-318/LEAP-012)                                      | Y |   | <a href="https://ClinicalTrials.gov/show/NCT04246177">https://ClinicalTrials.gov/show/NCT04246177</a> |
| Checkpoint inhibitor | Safety and Efficacy of Pembrolizumab (MK-3475) Plus Binimetinib Alone or Pembrolizumab Plus Chemotherapy With or Without Binimetinib in Metastatic Colorectal Cancer (mCRC) Participants (MK-3475-651)                                                                                      | Y |   | <a href="https://ClinicalTrials.gov/show/NCT03374254">https://ClinicalTrials.gov/show/NCT03374254</a> |
| Checkpoint inhibitor | Safety and Efficacy of Retifanlimab (INCMGA00012) Alone or in Combination With Other Therapies in Participants With Advanced or Metastatic Endometrial Cancer Who Have Progressed on or After Platinum-based Chemotherapy.                                                                  | Y |   | <a href="https://ClinicalTrials.gov/show/NCT04463771">https://ClinicalTrials.gov/show/NCT04463771</a> |
| Checkpoint inhibitor | Safety And Efficacy Study Of Avelumab Plus Chemotherapy With Or Without Other Anti-Cancer Immunotherapy Agents In Patients With Advanced Malignancies                                                                                                                                       | Y |   | <a href="https://ClinicalTrials.gov/show/NCT03317496">https://ClinicalTrials.gov/show/NCT03317496</a> |
| Checkpoint inhibitor | Safety and Efficacy Study of Pembrolizumab (MK-3475) in Combination With Chemotherapy as Neoadjuvant Treatment for Participants With Triple Negative Breast Cancer (TNBC) (MK-3475-173/KEYNOTE-173)                                                                                         | Y |   | <a href="https://ClinicalTrials.gov/show/NCT02622074">https://ClinicalTrials.gov/show/NCT02622074</a> |
| Checkpoint inhibitor | Safety and Efficacy Study of Pemtrexed + Platinum Chemotherapy + Pembrolizumab (MK-3475) With or Without Lenvatinib (MK-7902/E7080) as First-line Intervention in Adults With Metastatic Nonsquamous Non-small Cell Lung Cancer (MK-7902-006/E7080-G000-315/LEAP-006)-China Extension Study | Y |   | <a href="https://ClinicalTrials.gov/show/NCT04716933">https://ClinicalTrials.gov/show/NCT04716933</a> |
| Checkpoint inhibitor | Safety and Efficacy Study of Pemtrexed + Platinum Chemotherapy + Pembrolizumab (MK-3475) With or Without Lenvatinib (MK-7902/E7080) as First-line Intervention in Adults With Metastatic Nonsquamous Non-small Cell Lung Cancer (MK-7902-006/E7080-G000-315/LEAP-006)                       | Y |   | <a href="https://ClinicalTrials.gov/show/NCT03829319">https://ClinicalTrials.gov/show/NCT03829319</a> |
| Checkpoint inhibitor | Safety and Efficacy Study of Pemtrexed + Platinum Chemotherapy + Pembrolizumab (MK-3475) With or Without Lenvatinib (MK-7902/E7080) as First-line Intervention in Adults With Metastatic Nonsquamous Non-small Cell Lung Cancer (MK-7902-006/E7080-G000-315/LEAP-006)-China Extension Study | Y |   | <a href="https://ClinicalTrials.gov/show/NCT04716933">https://ClinicalTrials.gov/show/NCT04716933</a> |
| Checkpoint inhibitor | Safety and Tolerability Evaluation of Low-dose Radiation in Combination With CS1001 in Relapsed SCLC Patients                                                                                                                                                                               |   | Y | <a href="https://ClinicalTrials.gov/show/NCT04421352">https://ClinicalTrials.gov/show/NCT04421352</a> |
| Checkpoint inhibitor | Safety and Tolerability Evaluation of Sintilimab in Combination With Radiation in Stage IV NSCLC Patients                                                                                                                                                                                   |   | Y | <a href="https://ClinicalTrials.gov/show/NCT03812549">https://ClinicalTrials.gov/show/NCT03812549</a> |
| Checkpoint inhibitor | Safety Testing of Adding Nivolumab to Chemotherapy in Patients With Intermediate and High-Risk Locally-Advanced Head and Neck Cancer                                                                                                                                                        | Y |   | <a href="https://ClinicalTrials.gov/show/NCT02764593">https://ClinicalTrials.gov/show/NCT02764593</a> |
| Checkpoint inhibitor | SBRT/LDRT in Combination With Camrelizumab and Apatinib in Metastatic Non-small Cell Lung Cancer Patient Previously Treated With PD-1/L1 Inhibitor and Chemotherapy                                                                                                                         | Y |   | <a href="https://ClinicalTrials.gov/show/NCT04878107">https://ClinicalTrials.gov/show/NCT04878107</a> |
| Checkpoint inhibitor | Sequential PD-1/PD-L1 Inhibitor and LENVatinib in TLCT and Refractory Hepatoblastoma After Chemotherapy                                                                                                                                                                                     | Y |   | <a href="https://ClinicalTrials.gov/show/NCT05322187">https://ClinicalTrials.gov/show/NCT05322187</a> |
| Checkpoint inhibitor | Short Course Neoadjuvant Chemo-radiotherapy Plus Toripalimab for Locally Advanced Resectable Squamous Cell Carcinoma of Esophagus                                                                                                                                                           | Y |   | <a href="https://ClinicalTrials.gov/show/NCT05424432">https://ClinicalTrials.gov/show/NCT05424432</a> |
| Checkpoint inhibitor | SHR-1210 in Combination With Apatinib and Chemotherapy in Patients With Advanced Esophageal Squamous Cell Cancer                                                                                                                                                                            | Y |   | <a href="https://ClinicalTrials.gov/show/NCT03603756">https://ClinicalTrials.gov/show/NCT03603756</a> |
| Checkpoint inhibitor | SHR-1210 in Recurrent/Metastatic Nasopharyngeal Carcinoma Who Have Received Previous At Least Two Lines of Chemotherapy.                                                                                                                                                                    | Y |   | <a href="https://ClinicalTrials.gov/show/NCT03558191">https://ClinicalTrials.gov/show/NCT03558191</a> |
| Checkpoint inhibitor | SHR-1316 in Combination With Chemotherapy in Patients With Esophageal Squamous Cell Cancer                                                                                                                                                                                                  | Y |   | <a href="https://ClinicalTrials.gov/show/NCT03732508">https://ClinicalTrials.gov/show/NCT03732508</a> |
| Checkpoint inhibitor | Single Agent Chemotherapy +/- Nivolumab in Patients With Advanced Squamous or Non-squamous NSCLC With Primary Resistance to Prior PD-1 or PDL-1 Inhibitor                                                                                                                                   | Y |   | <a href="https://ClinicalTrials.gov/show/NCT03041181">https://ClinicalTrials.gov/show/NCT03041181</a> |

|                      |                                                                                                                                                                                                                                                                                                      |   |   |                                                                                                         |
|----------------------|------------------------------------------------------------------------------------------------------------------------------------------------------------------------------------------------------------------------------------------------------------------------------------------------------|---|---|---------------------------------------------------------------------------------------------------------|
| Checkpoint inhibitor | Sintilimab (PD-1 Antibody) and Chemoradiotherapy in Locoregionally-advanced Nasopharyngeal Carcinoma                                                                                                                                                                                                 | Y |   | <a href="https://ClinicalTrials.gov/show/NCT037000476">https://ClinicalTrials.gov/show/NCT037000476</a> |
| Checkpoint inhibitor | SiNtilimab After Radiation (STAR Study)                                                                                                                                                                                                                                                              |   | Y | <a href="https://ClinicalTrials.gov/show/NCT04167657">https://ClinicalTrials.gov/show/NCT04167657</a>   |
| Checkpoint inhibitor | Sintilimab in Combination With Chemotherapy in Neoadjuvant Treatment of Potentially Resectable Esophageal Cancer                                                                                                                                                                                     | Y |   | <a href="https://ClinicalTrials.gov/show/NCT03946969">https://ClinicalTrials.gov/show/NCT03946969</a>   |
| Checkpoint inhibitor | Sintilimab or Placebo With Chemotherapy in Esophageal Squamous Cell Carcinoma                                                                                                                                                                                                                        | Y |   | <a href="https://ClinicalTrials.gov/show/NCT03748134">https://ClinicalTrials.gov/show/NCT03748134</a>   |
| Checkpoint inhibitor | Stereotactic Ablative Radiation for Oligo-Progression of Urothelial Cancer                                                                                                                                                                                                                           | Y |   | <a href="https://ClinicalTrials.gov/show/NCT04131634">https://ClinicalTrials.gov/show/NCT04131634</a>   |
| Checkpoint inhibitor | Stereotactic Body Radiation Therapy (SBRT) Combined With Avelumab (Anti-PD-L1) for Management of Early Stage Non-Small Cell Lung Cancer (NSCLC)                                                                                                                                                      |   | Y | <a href="https://ClinicalTrials.gov/show/NCT03050554">https://ClinicalTrials.gov/show/NCT03050554</a>   |
| Checkpoint inhibitor | Stereotactic Body Radiation Therapy Combined With Anti-PD-1 Antibody in Metastatic Triple Negative Breast Cancer                                                                                                                                                                                     |   | Y | <a href="https://ClinicalTrials.gov/show/NCT03151447">https://ClinicalTrials.gov/show/NCT03151447</a>   |
| Checkpoint inhibitor | Stereotactic Body Radiation Therapy Combined With Anti-PD-1 Antibody in Patients With Hepatocellular Carcinoma                                                                                                                                                                                       |   | Y | <a href="https://ClinicalTrials.gov/show/NCT03857815">https://ClinicalTrials.gov/show/NCT03857815</a>   |
| Checkpoint inhibitor | Study of Adjuvant Chemotherapy With or Without PD-1 Inhibitors and Chemoradiotherapy in Resected pN3 Gastric (G) or GEJ Adenocarcinoma                                                                                                                                                               | Y |   | <a href="https://ClinicalTrials.gov/show/NCT04997837">https://ClinicalTrials.gov/show/NCT04997837</a>   |
| Checkpoint inhibitor | Study of Anti-PD-L1 in Combination With Chemo(Radio)Therapy for Oesophageal Cancer                                                                                                                                                                                                                   | Y |   | <a href="https://ClinicalTrials.gov/show/NCT02735239">https://ClinicalTrials.gov/show/NCT02735239</a>   |
| Checkpoint inhibitor | Study of Anti-PD-L1 in Combination With Chemo(Radio)Therapy for Resectable Esophageal Squamous Cell Carcinoma                                                                                                                                                                                        | Y |   | <a href="https://ClinicalTrials.gov/show/NCT04568200">https://ClinicalTrials.gov/show/NCT04568200</a>   |
| Checkpoint inhibitor | Study of Atezolizumab as Monotherapy and in Combination With Platinum-Based Chemotherapy in Participants With Untreated Locally Advanced or Metastatic Urothelial Carcinoma                                                                                                                          | Y |   | <a href="https://ClinicalTrials.gov/show/NCT02807636">https://ClinicalTrials.gov/show/NCT02807636</a>   |
| Checkpoint inhibitor | Study of Atezolizumab in Combination With Cabozantinib Versus Docetaxel in Patients With Metastatic Non-Small Cell Lung Cancer Previously Treated With an Anti-PD-L1/PD-1 Antibody and Platinum-Containing Chemotherapy                                                                              | Y |   | <a href="https://ClinicalTrials.gov/show/NCT04471428">https://ClinicalTrials.gov/show/NCT04471428</a>   |
| Checkpoint inhibitor | Study of Autologous CIK Cell Immunotherapy Combination With PD-1 Inhibitor and Chemotherapy in the Advanced NSCLC                                                                                                                                                                                    | Y |   | <a href="https://ClinicalTrials.gov/show/NCT03987867">https://ClinicalTrials.gov/show/NCT03987867</a>   |
| Checkpoint inhibitor | Study of Camrelizumab (SHR-1210) in Combination With Concurrent Chemoradiotherapy in Locally Advanced Esophageal Cancer                                                                                                                                                                              | Y |   | <a href="https://ClinicalTrials.gov/show/NCT04426955">https://ClinicalTrials.gov/show/NCT04426955</a>   |
| Checkpoint inhibitor | Study of Chemoradiotherapy With or Without Pembrolizumab (MK-3475) For The Treatment of Locally Advanced Cervical Cancer (MK-3475-A18/KEYNOTE-A18/ENGOT-cx11/GOG-3047)                                                                                                                               | Y |   | <a href="https://ClinicalTrials.gov/show/NCT04221945">https://ClinicalTrials.gov/show/NCT04221945</a>   |
| Checkpoint inhibitor | Study of Chemotherapy and PD-1 Inhibitor Combination With Anti-angiogenesis to Treat Elderly Lung Cancer                                                                                                                                                                                             | Y |   | <a href="https://ClinicalTrials.gov/show/NCT05273814">https://ClinicalTrials.gov/show/NCT05273814</a>   |
| Checkpoint inhibitor | Study of Chemotherapy and PD-1 Inhibitor Combination With Autologous CIK Cell Immunotherapy to Treat Lung Cancer                                                                                                                                                                                     | Y |   | <a href="https://ClinicalTrials.gov/show/NCT04836728">https://ClinicalTrials.gov/show/NCT04836728</a>   |
| Checkpoint inhibitor | Study of Chemotherapy Combination With Autologous Cell Immunotherapy in the Advanced Lung Cancer                                                                                                                                                                                                     | Y |   | <a href="https://ClinicalTrials.gov/show/NCT03944980">https://ClinicalTrials.gov/show/NCT03944980</a>   |
| Checkpoint inhibitor | Study of Chemotherapy Combination With Autologous Cell Immunotherapy in the Recurrent and Metastatic Colorectal Cancer                                                                                                                                                                               | Y |   | <a href="https://ClinicalTrials.gov/show/NCT03950154">https://ClinicalTrials.gov/show/NCT03950154</a>   |
| Checkpoint inhibitor | Study of Chemotherapy With Pembrolizumab (MK-3475) Followed by Maintenance With Olaparib (MK-7339) for the First-Line Treatment of Women With BRCA Non-mutated Advanced Epithelial Ovarian Cancer (EOC) (MK-7339-001/KEYLYNK-001/ENGOT-ov43/GOG-3036)                                                | Y |   | <a href="https://ClinicalTrials.gov/show/NCT03740165">https://ClinicalTrials.gov/show/NCT03740165</a>   |
| Checkpoint inhibitor | Study of Durvalumab (MED4736) After Chemo-Radiation for Microsatellite Stable Stage II-IV Rectal Cancer                                                                                                                                                                                              | Y | Y | <a href="https://ClinicalTrials.gov/show/NCT03102047">https://ClinicalTrials.gov/show/NCT03102047</a>   |
| Checkpoint inhibitor | Study of Durvalumab + Tremelimumab With Chemotherapy or Durvalumab With Chemotherapy or Chemotherapy Alone for Patients With Lung Cancer (POSEIDON)                                                                                                                                                  | Y |   | <a href="https://ClinicalTrials.gov/show/NCT03164616">https://ClinicalTrials.gov/show/NCT03164616</a>   |
| Checkpoint inhibitor | Study of Durvalumab Alone or Chemotherapy for Patients With Advanced Non Small-Cell Lung Cancer (PEARL)                                                                                                                                                                                              | Y |   | <a href="https://ClinicalTrials.gov/show/NCT03003962">https://ClinicalTrials.gov/show/NCT03003962</a>   |
| Checkpoint inhibitor | Study of Durvalumab or Durvalumab Plus Chemotherapy in Kras Mutation Positive and PD-L1 High ( ≥ 50%) NSCLC Patients                                                                                                                                                                                 | Y |   | <a href="https://ClinicalTrials.gov/show/NCT04470674">https://ClinicalTrials.gov/show/NCT04470674</a>   |
| Checkpoint inhibitor | Study of Durvalumab Versus Placebo in Combination With Definitive Chemoradiation Therapy in Patient With ESCC                                                                                                                                                                                        | Y | Y | <a href="https://ClinicalTrials.gov/show/NCT04550260">https://ClinicalTrials.gov/show/NCT04550260</a>   |
| Checkpoint inhibitor | Study of Efficacy and Safety of NIS793 (With and Without Spartalizumab) in Combination With SOC Chemotherapy in First-line Metastatic Pancreatic Ductal Adenocarcinoma (mPDAC)                                                                                                                       | Y |   | <a href="https://ClinicalTrials.gov/show/NCT04390763">https://ClinicalTrials.gov/show/NCT04390763</a>   |
| Checkpoint inhibitor | Study of Efficacy and Safety of Pembrolizumab Plus Platinum-based Doublet Chemotherapy With or Without Canakinumab in Previously Untreated Locally Advanced or Metastatic Non-squamous and Squamous NSCLC Subjects                                                                                   | Y |   | <a href="https://ClinicalTrials.gov/show/NCT03631199">https://ClinicalTrials.gov/show/NCT03631199</a>   |
| Checkpoint inhibitor | Study of Epacadostat (INCB024360) Alone and In Combination With Pembrolizumab (MK-3475) With Chemotherapy and Pembrolizumab Without Chemotherapy in Participants With Advanced Solid Tumors (MK-3475-434)                                                                                            | Y |   | <a href="https://ClinicalTrials.gov/show/NCT02862457">https://ClinicalTrials.gov/show/NCT02862457</a>   |
| Checkpoint inhibitor | Study of Favezelimab (MK-4280) as Monotherapy and in Combination With Pembrolizumab (MK-3475) With or Without Chemotherapy or Lenvatinib (MK-7902) AND Favezelimab/Pembrolizumab (MK-4280A) as Monotherapy in Adults With Advanced Solid Tumors (MK-4280-001)                                        | Y |   | <a href="https://ClinicalTrials.gov/show/NCT02720068">https://ClinicalTrials.gov/show/NCT02720068</a>   |
| Checkpoint inhibitor | Study of First-line Pembrolizumab (MK-3475) With Lenvatinib (MK-7902/E7080) in Urothelial Carcinoma Cisplatin-ineligible Participants Whose Tumors Express Programmed Cell Death-Ligand 1 and in Participants Ineligible for Platinum-containing Chemotherapy (MK-7902-011/E7080-G000-317/ LEAP-011) | Y |   | <a href="https://ClinicalTrials.gov/show/NCT03898180">https://ClinicalTrials.gov/show/NCT03898180</a>   |
| Checkpoint inhibitor | Study of Immune Checkpoint Inhibition With Radiation Therapy in Unresectable, Non-metastatic Pancreatic Cancer                                                                                                                                                                                       |   | Y | <a href="https://ClinicalTrials.gov/show/NCT02868632">https://ClinicalTrials.gov/show/NCT02868632</a>   |
| Checkpoint inhibitor | Study of Olaparib Plus Pembrolizumab Versus Chemotherapy Plus Pembrolizumab After Induction With First-Line Chemotherapy Plus Pembrolizumab in Triple Negative Breast Cancer (TNBC) (MK-7339-009/KEYLYNK-009)                                                                                        | Y |   | <a href="https://ClinicalTrials.gov/show/NCT04191135">https://ClinicalTrials.gov/show/NCT04191135</a>   |
| Checkpoint inhibitor | Study of PD-1 Antibody and Bevacizumab in the Treatment of High-risk GTN After Combined Chemotherapy                                                                                                                                                                                                 | Y |   | <a href="https://ClinicalTrials.gov/show/NCT04812002">https://ClinicalTrials.gov/show/NCT04812002</a>   |
| Checkpoint inhibitor | Study of PD-1 Antibody Combined With Chemoradiotherapy in Oligometastatic Esophageal Cancer                                                                                                                                                                                                          | Y |   | <a href="https://ClinicalTrials.gov/show/NCT04821765">https://ClinicalTrials.gov/show/NCT04821765</a>   |
| Checkpoint inhibitor | Study of PD-1 Monoclonal Antibody in Combination With Chemotherapy in Patients With RR NHL                                                                                                                                                                                                           | Y |   | <a href="https://ClinicalTrials.gov/show/NCT04134247">https://ClinicalTrials.gov/show/NCT04134247</a>   |
| Checkpoint inhibitor | Study of Pembrolizumab (MK-3475) Compared to Platinum-Based Chemotherapies in Participants With Metastatic Non-Small Cell Lung Cancer (MK-3475-024/KEYNOTE-024)                                                                                                                                      | Y |   | <a href="https://ClinicalTrials.gov/show/NCT02142738">https://ClinicalTrials.gov/show/NCT02142738</a>   |
| Checkpoint inhibitor | Study of Pembrolizumab (MK-3475) in Combination With Adjuvant Chemotherapy With or Without Radiotherapy in Participants With Newly Diagnosed Endometrial Cancer After Surgery With Curative Intent (MK-3475-B21 / KEYNOTE-B21 / ENGOT-en11 / GOG-3053)                                               | Y |   | <a href="https://ClinicalTrials.gov/show/NCT04634877">https://ClinicalTrials.gov/show/NCT04634877</a>   |
| Checkpoint inhibitor | Study of Pembrolizumab (MK-3475) or Placebo With Chemoradiation in Participants With Locally Advanced Head and Neck Squamous Cell Carcinoma (MK-3475-412/KEYNOTE-412)                                                                                                                                | Y | Y | <a href="https://ClinicalTrials.gov/show/NCT03040999">https://ClinicalTrials.gov/show/NCT03040999</a>   |
| Checkpoint inhibitor | Study of Pembrolizumab (MK-3475) Plus Chemotherapy Versus Placebo Plus Chemotherapy for HR+/HER2- Locally Recurrent Inoperable or Metastatic Breast Cancer (MK-3475-B49/KEYNOTE-B49)                                                                                                                 | Y |   | <a href="https://ClinicalTrials.gov/show/NCT04895358">https://ClinicalTrials.gov/show/NCT04895358</a>   |
| Checkpoint inhibitor | Study of Pembrolizumab (MK-3475) Plus Chemotherapy Versus Placebo Plus Chemotherapy in Participants With Gastric or Gastroesophageal Junction (GEJ) Adenocarcinoma (MK-3475-585/KEYNOTE-585)                                                                                                         | Y |   | <a href="https://ClinicalTrials.gov/show/NCT03221426">https://ClinicalTrials.gov/show/NCT03221426</a>   |
| Checkpoint inhibitor | Study of Pembrolizumab (MK-3475) Plus Chemotherapy Versus Placebo Plus Chemotherapy in Participants With Gastric or Gastroesophageal Junction (GEJ) Adenocarcinoma (MK-3475-585/KEYNOTE-585)-China Extension                                                                                         | Y |   | <a href="https://ClinicalTrials.gov/show/NCT04882241">https://ClinicalTrials.gov/show/NCT04882241</a>   |
| Checkpoint inhibitor | Study of Pembrolizumab (MK-3475) Plus Chemotherapy vs Placebo Plus Chemotherapy as Neoadjuvant Therapy and Pembrolizumab vs Placebo as Adjuvant Therapy in Participants With Triple Negative Breast Cancer (TNBC) (MK-3475-522/KEYNOTE-522)                                                          | Y |   | <a href="https://ClinicalTrials.gov/show/NCT03036488">https://ClinicalTrials.gov/show/NCT03036488</a>   |
| Checkpoint inhibitor | Study of Pembrolizumab (MK-3475) Plus Chemotherapy vs. Placebo Plus Chemotherapy for Previously Untreated Locally Recurrent Inoperable or Metastatic Triple Negative Breast Cancer (MK-3475-355/KEYNOTE-355)                                                                                         | Y |   | <a href="https://ClinicalTrials.gov/show/NCT02819518">https://ClinicalTrials.gov/show/NCT02819518</a>   |
| Checkpoint inhibitor | Study of Pembrolizumab (MK-3475) Plus Docetaxel Versus Placebo Plus Docetaxel in Chemotherapy-naïve Metastatic Castration-resistant Prostate Cancer (mCRPC) (MK-3475-921/KEYNOTE-921)                                                                                                                | Y |   | <a href="https://ClinicalTrials.gov/show/NCT03834506">https://ClinicalTrials.gov/show/NCT03834506</a>   |
| Checkpoint inhibitor | Study of Pembrolizumab (MK-3475) Plus Docetaxel Versus Placebo Plus Docetaxel in Chemotherapy-naïve Metastatic Castration-resistant Prostate Cancer (mCRPC) (MK-3475-921/KEYNOTE-921)-China Extension                                                                                                | Y |   | <a href="https://ClinicalTrials.gov/show/NCT04907227">https://ClinicalTrials.gov/show/NCT04907227</a>   |
| Checkpoint inhibitor | Study of Pembrolizumab (MK-3475) Subcutaneous (SC) Versus Pembrolizumab Intravenous (IV) Administered With Platinum Doublet Chemotherapy in Participants With Metastatic Squamous or Nonsquamous Non-Small Cell Lung Cancer (NSCLC) (MK-3475-A86)                                                    | Y |   | <a href="https://ClinicalTrials.gov/show/NCT04956692">https://ClinicalTrials.gov/show/NCT04956692</a>   |
| Checkpoint inhibitor | Study of Pembrolizumab (MK-3475) Versus Chemotherapy in Chinese Participants With Stage IV Colorectal Cancer (MK-3475-C66)                                                                                                                                                                           | Y |   | <a href="https://ClinicalTrials.gov/show/NCT05239741">https://ClinicalTrials.gov/show/NCT05239741</a>   |

|                      |                                                                                                                                                                                                                                                                                              |   |   |                                                                                                       |
|----------------------|----------------------------------------------------------------------------------------------------------------------------------------------------------------------------------------------------------------------------------------------------------------------------------------------|---|---|-------------------------------------------------------------------------------------------------------|
| Checkpoint inhibitor | Study of Pembrolizumab (MK-3475) Versus Chemotherapy in Mismatch Repair Deficient (dMMR) Advanced or Recurrent Endometrial Carcinoma (MK-3475-C93/KEYNOTE-C93/GOG-3064/ENGOT-en15)                                                                                                           | Y |   | <a href="https://ClinicalTrials.gov/show/NCT05173987">https://ClinicalTrials.gov/show/NCT05173987</a> |
| Checkpoint inhibitor | Study of Pembrolizumab (MK-3475) Versus Chemotherapy in Participants With Advanced Melanoma (MK-3475-002/P08719/KEYNOTE-002)                                                                                                                                                                 | Y |   | <a href="https://ClinicalTrials.gov/show/NCT01704287">https://ClinicalTrials.gov/show/NCT01704287</a> |
| Checkpoint inhibitor | Study of Pembrolizumab (MK-3475) Versus Investigator's Choice of Chemotherapy for Participants With Advanced Esophageal/Esophagogastric Junction Carcinoma That Progressed After First-Line Therapy (MK-3475-181/KEYNOTE-181)-China Extension Study                                          | Y |   | <a href="https://ClinicalTrials.gov/show/NCT03933449">https://ClinicalTrials.gov/show/NCT03933449</a> |
| Checkpoint inhibitor | Study of Pembrolizumab (MK-3475) Versus Placebo in Combination With Neoadjuvant Chemotherapy & Adjuvant Endocrine Therapy in the Treatment of Early-Stage Estrogen Receptor-Positive, Human Epidermal Growth Factor Receptor 2-Negative (ER+/HER2-) Breast Cancer (MK-3475-756/KEYNOTE-756)  | Y |   | <a href="https://ClinicalTrials.gov/show/NCT03725059">https://ClinicalTrials.gov/show/NCT03725059</a> |
| Checkpoint inhibitor | Study of Pembrolizumab (MK-3475) Versus Placebo in Participants With Esophageal Carcinoma Who Are Receiving Chemotherapy and Radiation Therapy (MK-3475-975/KEYNOTE-975)                                                                                                                     | Y | Y | <a href="https://ClinicalTrials.gov/show/NCT04210115">https://ClinicalTrials.gov/show/NCT04210115</a> |
| Checkpoint inhibitor | Study of Pembrolizumab (MK-3475) Versus Platinum-Based Chemotherapy for Participants With Programmed Cell Death-Ligand 1 (PD-L1)-Positive Advanced or Metastatic Non-Small Cell Lung Cancer (MK-3475-042/KEYNOTE-042)                                                                        | Y |   | <a href="https://ClinicalTrials.gov/show/NCT02202894">https://ClinicalTrials.gov/show/NCT02202894</a> |
| Checkpoint inhibitor | Study of Pembrolizumab (MK-3475) Versus Platinum-Based Chemotherapy for Participants With Programmed Cell Death-Ligand 1 (PD-L1)-Positive Advanced or Metastatic Non-Small Cell Lung Cancer (MK-3475-042/KEYNOTE-042)-China Extension Study                                                  | Y |   | <a href="https://ClinicalTrials.gov/show/NCT03850444">https://ClinicalTrials.gov/show/NCT03850444</a> |
| Checkpoint inhibitor | Study of Pembrolizumab and Chemotherapy With or Without Radiation in Small Cell Lung Cancer (SCLC)                                                                                                                                                                                           | Y | Y | <a href="https://ClinicalTrials.gov/show/NCT02934503">https://ClinicalTrials.gov/show/NCT02934503</a> |
| Checkpoint inhibitor | Study of Pembrolizumab With Concurrent Chemoradiation Therapy Followed by Pembrolizumab With or Without Olaparib in Stage III Non-Small Cell Lung Cancer (NSCLC) (MK-7339-012/KEYLYNK-012)                                                                                                   | Y | Y | <a href="https://ClinicalTrials.gov/show/NCT04380636">https://ClinicalTrials.gov/show/NCT04380636</a> |
| Checkpoint inhibitor | Study of Pembrolizumab With or Without Defactinib Following Chemotherapy as a Neoadjuvant and Adjuvant Treatment for Resectable Pancreatic Ductal Adenocarcinoma                                                                                                                             | Y |   | <a href="https://ClinicalTrials.gov/show/NCT03727880">https://ClinicalTrials.gov/show/NCT03727880</a> |
| Checkpoint inhibitor | Study of Pembrolizumab With or Without Platinum-based Combination Chemotherapy Versus Chemotherapy Alone in Urothelial Carcinoma (MK-3475-361/KEYNOTE-361)                                                                                                                                   | Y |   | <a href="https://ClinicalTrials.gov/show/NCT02853305">https://ClinicalTrials.gov/show/NCT02853305</a> |
| Checkpoint inhibitor | Study of Pembrolizumab With Single Agent Chemotherapy in Elderly Patients With Advanced NSCLC                                                                                                                                                                                                | Y |   | <a href="https://ClinicalTrials.gov/show/NCT04754815">https://ClinicalTrials.gov/show/NCT04754815</a> |
| Checkpoint inhibitor | Study of Pembrolizumab/Vibostolimab (MK-7684A) in Combination With Concurrent Chemoradiotherapy Followed by Pembrolizumab/Vibostolimab Versus Concurrent Chemoradiotherapy Followed by Durvalumab in Participants With Stage III Non-small Cell Lung Cancer (MK-7684A-006/KEYVIBE-006)       | Y |   | <a href="https://ClinicalTrials.gov/show/NCT05298423">https://ClinicalTrials.gov/show/NCT05298423</a> |
| Checkpoint inhibitor | Study of Pemtrexed + Platinum Chemotherapy With or Without Pembrolizumab (MK-3475) in Adults With Tyrosine Kinase Inhibitor- (TKI)-Resistant Epidermal Growth Factor Receptor- (EGFR)-Mutated Metastatic Non-squamous Non-small Cell Lung Cancer (NSCLC) (MK-3475-789/KEYNOTE-789)           | Y |   | <a href="https://ClinicalTrials.gov/show/NCT03515837">https://ClinicalTrials.gov/show/NCT03515837</a> |
| Checkpoint inhibitor | Study of Pemtrexed+Platinum Chemotherapy With or Without Cosbelimab (CK-301) in First Line Metastatic Non-squamous Non-Small Cell Lung Cancer                                                                                                                                                | Y |   | <a href="https://ClinicalTrials.gov/show/NCT04786964">https://ClinicalTrials.gov/show/NCT04786964</a> |
| Checkpoint inhibitor | Study of Pemtrexed+Platinum Chemotherapy With or Without Pembrolizumab (MK-3475) in Participants With First Line Metastatic Nonsquamous Non-small Cell Lung Cancer (MK-3475-189/KEYNOTE-189)                                                                                                 | Y |   | <a href="https://ClinicalTrials.gov/show/NCT02578680">https://ClinicalTrials.gov/show/NCT02578680</a> |
| Checkpoint inhibitor | Study of Pemtrexed+Platinum Chemotherapy With or Without Pembrolizumab (MK-3475) in Participants With First Line Metastatic Nonsquamous Non-small Cell Lung Cancer (MK-3475-189/KEYNOTE-189)- Japan Extension Study                                                                          | Y |   | <a href="https://ClinicalTrials.gov/show/NCT03950674">https://ClinicalTrials.gov/show/NCT03950674</a> |
| Checkpoint inhibitor | Study of REGN 2810 Compared to Platinum-Based Chemotherapies in Participants With Metastatic Non-Small Cell Lung Cancer (NSCLC)                                                                                                                                                              | Y |   | <a href="https://ClinicalTrials.gov/show/NCT03088540">https://ClinicalTrials.gov/show/NCT03088540</a> |
| Checkpoint inhibitor | Study of Sacituzumab Govitecan-hzly (SG) Versus Docetaxel in Participants With Advanced or Metastatic Non-Small Cell Lung Cancer (NSCLC) With Progression on or After Platinum-Based Chemotherapy and Anti-programmed Death Protein 1 (PD-1)/Programmed Death Ligand 1 (PD-L1) Immunotherapy | Y |   | <a href="https://ClinicalTrials.gov/show/NCT05089734">https://ClinicalTrials.gov/show/NCT05089734</a> |
| Checkpoint inhibitor | Study of Safety and Efficacy of Pembrolizumab and Chemotherapy in Participants With Newly Diagnosed Classical Hodgkin Lymphoma (cHL) (MK-3475-C11/KEYNOTE-C11)                                                                                                                               | Y |   | <a href="https://ClinicalTrials.gov/show/NCT05008224">https://ClinicalTrials.gov/show/NCT05008224</a> |
| Checkpoint inhibitor | Study of SHR-1210 in Combination With Chemotherapy in Advanced Esophageal Cancer                                                                                                                                                                                                             | Y |   | <a href="https://ClinicalTrials.gov/show/NCT03691090">https://ClinicalTrials.gov/show/NCT03691090</a> |
| Checkpoint inhibitor | Study of SHR2150 (TLR7 Agonist) in Combination With Chemotherapy Plus PD-1 or CD47 Antibody in Subjects With Unresectable/ Metastatic Solid Tumors                                                                                                                                           | Y |   | <a href="https://ClinicalTrials.gov/show/NCT04588324">https://ClinicalTrials.gov/show/NCT04588324</a> |
| Checkpoint inhibitor | Study of Single Agent Pembrolizumab (MK-3475) Versus Single Agent Chemotherapy for Metastatic Triple Negative Breast Cancer (MK-3475-119/KEYNOTE-119)                                                                                                                                        | Y |   | <a href="https://ClinicalTrials.gov/show/NCT02555657">https://ClinicalTrials.gov/show/NCT02555657</a> |
| Checkpoint inhibitor | Study of the PD-L1 Inhibitor Atezolizumab With or Without Low-dose, Local Radiation in Patients With Relapsed or Refractory Advanced Stage Follicular Lymphoma                                                                                                                               |   | Y | <a href="https://ClinicalTrials.gov/show/NCT03465891">https://ClinicalTrials.gov/show/NCT03465891</a> |
| Checkpoint inhibitor | Study of ZKAB001 for Maintenance Therapy in Patients With High-grade Osteosarcoma After Adjuvant Chemotherapy                                                                                                                                                                                | Y |   | <a href="https://ClinicalTrials.gov/show/NCT04359550">https://ClinicalTrials.gov/show/NCT04359550</a> |
| Checkpoint inhibitor | Study Title: Peri-operative Immuno-Chemotherapy in Operable Oesophageal and Gastric Cancer                                                                                                                                                                                                   | Y |   | <a href="https://ClinicalTrials.gov/show/NCT03399071">https://ClinicalTrials.gov/show/NCT03399071</a> |
| Checkpoint inhibitor | Study to Assess Safety and Efficacy of Atezolizumab (MPDL3280A) Compared to Best Supportive Care Following Chemotherapy in Patients With Lung Cancer [Ipower010]                                                                                                                             | Y |   | <a href="https://ClinicalTrials.gov/show/NCT02486718">https://ClinicalTrials.gov/show/NCT02486718</a> |
| Checkpoint inhibitor | Study With Atezolizumab Plus Bevacizumab in Patients With Chemotherapy Resistant, MSI-like, Colorectal Cancer                                                                                                                                                                                | Y |   | <a href="https://ClinicalTrials.gov/show/NCT02982694">https://ClinicalTrials.gov/show/NCT02982694</a> |
| Checkpoint inhibitor | Systemic Chemotherapy Plus PD-1 for Metastasis ICC                                                                                                                                                                                                                                           | Y |   | <a href="https://ClinicalTrials.gov/show/NCT04389827">https://ClinicalTrials.gov/show/NCT04389827</a> |
| Checkpoint inhibitor | Tapestry: Addition of TGF-b and PDL-1 Inhibition to Definitive Chemoradiation in Esophageal Squamous Cell Carcinoma                                                                                                                                                                          | Y | Y | <a href="https://ClinicalTrials.gov/show/NCT04595149">https://ClinicalTrials.gov/show/NCT04595149</a> |
| Checkpoint inhibitor | Targeting PD-1 Therapy Resistance With Focused High or High and Low Dose Radiation in SCCHN                                                                                                                                                                                                  |   | Y | <a href="https://ClinicalTrials.gov/show/NCT03085719">https://ClinicalTrials.gov/show/NCT03085719</a> |
| Checkpoint inhibitor | Testing Combination Erdafitinib and Enfortumab Vedotin in Metastatic Bladder Cancer After Treatment With Chemotherapy and Immunotherapy                                                                                                                                                      | Y |   | <a href="https://ClinicalTrials.gov/show/NCT04963153">https://ClinicalTrials.gov/show/NCT04963153</a> |
| Checkpoint inhibitor | Testing the Addition of Anti-Cancer Drug, ZEN003694 (ZEN-3694) and PD-1 Inhibitor (Pembrolizumab), to Standard Chemotherapy (Nab-Paclitaxel) Treatment in Patients With Advanced Triple-Negative Breast Cancer                                                                               | Y |   | <a href="https://ClinicalTrials.gov/show/NCT05422794">https://ClinicalTrials.gov/show/NCT05422794</a> |
| Checkpoint inhibitor | Testing the Addition of Radiation Therapy to Immunotherapy for Merkel Cell Carcinoma                                                                                                                                                                                                         |   | Y | <a href="https://ClinicalTrials.gov/show/NCT03304639">https://ClinicalTrials.gov/show/NCT03304639</a> |
| Checkpoint inhibitor | Testing the Addition of Radiation Therapy to the Usual Treatment (Immunotherapy With or Without Chemotherapy) for Stage IV Non-Small Cell Lung Cancer Patients Who Are PD-L1 Negative                                                                                                        | Y | Y | <a href="https://ClinicalTrials.gov/show/NCT04929041">https://ClinicalTrials.gov/show/NCT04929041</a> |
| Checkpoint inhibitor | Testing the PD-1 Inhibitor Pembrolizumab as Maintenance Therapy After Initial Chemotherapy in Metastatic Bladder Cancer                                                                                                                                                                      | Y |   | <a href="https://ClinicalTrials.gov/show/NCT02500121">https://ClinicalTrials.gov/show/NCT02500121</a> |
| Checkpoint inhibitor | TGF-b And PDL-1 Inhibition in Esophageal Squamous Cell Carcinoma Combined With Chemoradiation TheRapY                                                                                                                                                                                        | Y | Y | <a href="https://ClinicalTrials.gov/show/NCT04481256">https://ClinicalTrials.gov/show/NCT04481256</a> |
| Checkpoint inhibitor | The Efficacy of JS001 Combined With Chemotherapy in Patients With Locally Advanced Colon Cancer                                                                                                                                                                                              | Y |   | <a href="https://ClinicalTrials.gov/show/NCT03985891">https://ClinicalTrials.gov/show/NCT03985891</a> |
| Checkpoint inhibitor | The Safety and Efficacy of PD-1 Monoantirapical Chemotherapy in the Treatment of Local Advanced Stomach Cancer                                                                                                                                                                               | Y |   | <a href="https://ClinicalTrials.gov/show/NCT05000554">https://ClinicalTrials.gov/show/NCT05000554</a> |
| Checkpoint inhibitor | The Safety and Efficacy of Transarterial Chemoembolization (TACE) + Lenvatinib + Programmed Cell Death Protein 1 (PD-1) Antibody of Advanced Unresectable Hepatocellular Carcinoma                                                                                                           | Y |   | <a href="https://ClinicalTrials.gov/show/NCT04997850">https://ClinicalTrials.gov/show/NCT04997850</a> |
| Checkpoint inhibitor | Tiselimuzumab (PD-1 Antibody) and Chemoradiotherapy in Locoregionally-advanced Nasopharyngeal Carcinoma                                                                                                                                                                                      | Y |   | <a href="https://ClinicalTrials.gov/show/NCT04870905">https://ClinicalTrials.gov/show/NCT04870905</a> |
| Checkpoint inhibitor | Tiselimuzumab Combined With Chemotherapy With or Without Bevacizumab in TKI-Resistant EGFR-Mutated Non-squamous NSCLC                                                                                                                                                                        | Y |   | <a href="https://ClinicalTrials.gov/show/NCT04405674">https://ClinicalTrials.gov/show/NCT04405674</a> |
| Checkpoint inhibitor | Tiselimuzumab in Combination With Anlotinib With ES-SCLC as Maintenance Therapy After First Line Chemotherapy                                                                                                                                                                                | Y |   | <a href="https://ClinicalTrials.gov/show/NCT04620837">https://ClinicalTrials.gov/show/NCT04620837</a> |
| Checkpoint inhibitor | to Evaluate Efficacy and Safety of HLX10 in Combination With Chemotherapy Versus Placebo in Combination With Chemotherapy as Neoadjuvant Therapy and HLX10 Versus Placebo as Adjuvant Therapy in Patients With Triple Negative Breast Cancer (TNBC)                                          | Y |   | <a href="https://ClinicalTrials.gov/show/NCT04301739">https://ClinicalTrials.gov/show/NCT04301739</a> |
| Checkpoint inhibitor | Toripalimab as Monotherapy for Patients With Small Cell Carcinoma of Esophagus Who Failed Chemotherapy                                                                                                                                                                                       | Y |   | <a href="https://ClinicalTrials.gov/show/NCT03811379">https://ClinicalTrials.gov/show/NCT03811379</a> |
| Checkpoint inhibitor | Toripalimab Combined With Chemotherapy in Primary Tracheal Squamous Cell Carcinoma                                                                                                                                                                                                           | Y |   | <a href="https://ClinicalTrials.gov/show/NCT04716751">https://ClinicalTrials.gov/show/NCT04716751</a> |
| Checkpoint inhibitor | Toripalimab in Combination With Platinum-based Chemotherapy for Mutation-negative Stage IV Oligometastatic NSCLC                                                                                                                                                                             | Y |   | <a href="https://ClinicalTrials.gov/show/NCT05055583">https://ClinicalTrials.gov/show/NCT05055583</a> |
| Checkpoint inhibitor | Toripalimab Plus Concurrent Chemo-radiotherapy for Unresectable Locally Recurrent Nasopharyngeal Carcinoma                                                                                                                                                                                   | Y |   | <a href="https://ClinicalTrials.gov/show/NCT04453813">https://ClinicalTrials.gov/show/NCT04453813</a> |
| Checkpoint inhibitor | Toripalimab Plus TPF Chemotherapy and Radiotherapy for LA-HPSCC                                                                                                                                                                                                                              | Y |   | <a href="https://ClinicalTrials.gov/show/NCT04624308">https://ClinicalTrials.gov/show/NCT04624308</a> |
| Checkpoint inhibitor | Toripalimab With Preoperative Chemoradiotherapy for LA-EGJ                                                                                                                                                                                                                                   | Y |   | <a href="https://ClinicalTrials.gov/show/NCT04061928">https://ClinicalTrials.gov/show/NCT04061928</a> |
| Checkpoint inhibitor | Toripalimab, Endostar Combined With Radiotherapy and Chemotherapy for Nasopharyngeal Carcinoma                                                                                                                                                                                               | Y |   | <a href="https://ClinicalTrials.gov/show/NCT04447326">https://ClinicalTrials.gov/show/NCT04447326</a> |
| Checkpoint inhibitor | TQB2450 (PD-L1 Inhibitor) Plus Anlotinib Combined With Chemotherapy in the Treatment of Gastric or Gastroesophageal Junction Adenocarcinoma                                                                                                                                                  | Y |   | <a href="https://ClinicalTrials.gov/show/NCT04891900">https://ClinicalTrials.gov/show/NCT04891900</a> |
| Checkpoint inhibitor | Treating Early-stage Non-Small Cell Lung Cancer With Durvalumab and Radiation Therapy                                                                                                                                                                                                        |   | Y | <a href="https://ClinicalTrials.gov/show/NCT04716946">https://ClinicalTrials.gov/show/NCT04716946</a> |
| Checkpoint inhibitor | Trial of Anti-PD-1 Immunotherapy and Stereotactic Radiation in Patients With Recurrent Glioblastoma                                                                                                                                                                                          |   | Y | <a href="https://ClinicalTrials.gov/show/NCT04977375">https://ClinicalTrials.gov/show/NCT04977375</a> |



|                      |                                                                                                                                                                                     |   |   |                                                                                                       |
|----------------------|-------------------------------------------------------------------------------------------------------------------------------------------------------------------------------------|---|---|-------------------------------------------------------------------------------------------------------|
| Checkpoint inhibitor | Trial of Atezolizumab Plus Chemotherapy After Progression on PD-1 or PD-L1 in Cisplatin-ineligible Patients With Advanced Urothelial Carcinoma                                      | Y |   | <a href="https://ClinicalTrials.gov/show/NCT03737123">https://ClinicalTrials.gov/show/NCT03737123</a> |
| Checkpoint inhibitor | Trial of Chemoradiation and Pembrolizumab in Patients With Rectal Cancer                                                                                                            | Y | Y | <a href="https://ClinicalTrials.gov/show/NCT02586610">https://ClinicalTrials.gov/show/NCT02586610</a> |
| Checkpoint inhibitor | Trial of Nivolumab With FOLFOX After Chemoradiation in Rectal Cancer Patients                                                                                                       | Y | Y | <a href="https://ClinicalTrials.gov/show/NCT03921684">https://ClinicalTrials.gov/show/NCT03921684</a> |
| Checkpoint inhibitor | TSR-042 as Maintenance Therapy for Patients With High-risk Locally Advanced Cervical Cancer After Chemo-radiation (ATOMICC)                                                         | Y | Y | <a href="https://ClinicalTrials.gov/show/NCT03833479">https://ClinicalTrials.gov/show/NCT03833479</a> |
| Checkpoint inhibitor | TSR-042 in Addition to Standard of Care Definitive Radiation for Inoperable Endometrial Cancer                                                                                      |   | Y | <a href="https://ClinicalTrials.gov/show/NCT03955978">https://ClinicalTrials.gov/show/NCT03955978</a> |
| Checkpoint inhibitor | TTX-030 in Combination With Immunotherapy and/or Chemotherapy in Subjects With Advanced Cancers                                                                                     | Y |   | <a href="https://ClinicalTrials.gov/show/NCT04306900">https://ClinicalTrials.gov/show/NCT04306900</a> |
| Checkpoint inhibitor | TTX-030 Single Agent and in Combination With Immunotherapy or Chemotherapy for Patients With Advanced Cancers                                                                       | Y |   | <a href="https://ClinicalTrials.gov/show/NCT03884556">https://ClinicalTrials.gov/show/NCT03884556</a> |
| Checkpoint inhibitor | Two Stage Study of Combination of Chemotherapy, SHR-1210 and/or Decitabine for Relapsed/Refractory PMBCLs                                                                           | Y |   | <a href="https://ClinicalTrials.gov/show/NCT03346642">https://ClinicalTrials.gov/show/NCT03346642</a> |
| Checkpoint inhibitor | CTLA-4 /PD-L1 Blockade Following Transarterial Chemoembolization (DEB-TACE) in Patients With Intermediate Stage of HCC (Hepatocellular Carcinoma) Using Durvalumab and Tremelimumab | Y |   | <a href="https://ClinicalTrials.gov/show/NCT03638141">https://ClinicalTrials.gov/show/NCT03638141</a> |
| Checkpoint inhibitor | Induction of Immune-mediated aBscOpal Effect thrOugh STereotactic Radiation Therapy in Metastatic Melanoma Patients Treated by PD-1 + CTLA-4 Inhibitors (BOOSTER MELANOMA)          |   | Y | <a href="https://ClinicalTrials.gov/show/NCT03354962">https://ClinicalTrials.gov/show/NCT03354962</a> |
| Checkpoint inhibitor | REGN2810 (Anti-PD-1 Antibody), Platinum-based Doublet Chemotherapy, and Ipilimumab (Anti-CTLA-4 Antibody) Versus Pembrolizumab Monotherapy in Patients With Lung Cancer             | Y |   | <a href="https://ClinicalTrials.gov/show/NCT03515629">https://ClinicalTrials.gov/show/NCT03515629</a> |
| Checkpoint inhibitor | Anti-CTLA4-NF mAb (BMS986218), Nivolumab, and Stereotactic Body Radiation Therapy for the Treatment of Metastatic Solid Malignancies                                                |   | Y | <a href="https://ClinicalTrials.gov/show/NCT04785287">https://ClinicalTrials.gov/show/NCT04785287</a> |
| Checkpoint inhibitor | Neoadjuvant Durvalumab and Tremelimumab Plus Radiation for High Risk Soft-Tissue Sarcoma                                                                                            |   | Y | <a href="https://ClinicalTrials.gov/show/NCT03116529">https://ClinicalTrials.gov/show/NCT03116529</a> |
| Checkpoint inhibitor | A Phase Ib/II Study of AK104 and AK117 in Combination With or Without Chemotherapy in Advanced Malignant Tumors                                                                     | Y |   | <a href="https://ClinicalTrials.gov/show/NCT05235542">https://ClinicalTrials.gov/show/NCT05235542</a> |
| Checkpoint inhibitor | AK104 Combined With Chemotherapy as Neoadjuvant Treatment for Advanced Ovarian Cancer                                                                                               | Y |   | <a href="https://ClinicalTrials.gov/show/NCT05430906">https://ClinicalTrials.gov/show/NCT05430906</a> |
| Checkpoint inhibitor | NBTXR3, Radiation Therapy, Ipilimumab, and Nivolumab for the Treatment of Lung and/or Liver Metastases From Solid Malignancy                                                        |   | Y | <a href="https://ClinicalTrials.gov/show/NCT05039632">https://ClinicalTrials.gov/show/NCT05039632</a> |
| Checkpoint inhibitor | Immunotherapy With Neo-adjuvant Chemotherapy for Ovarian Cancer                                                                                                                     | Y |   | <a href="https://ClinicalTrials.gov/show/NCT03249142">https://ClinicalTrials.gov/show/NCT03249142</a> |
| Checkpoint inhibitor | Radiation Therapy and Durvalumab With or Without Tremelimumab in Treating Participants With Unresectable, Locally Advanced, or Metastatic Bladder Cancer                            |   | Y | <a href="https://ClinicalTrials.gov/show/NCT03601455">https://ClinicalTrials.gov/show/NCT03601455</a> |
| Checkpoint inhibitor | Radiation Therapy and Durvalumab, With or Without Tremelimumab, in Patients With Bladder Cancer                                                                                     |   | Y | <a href="https://ClinicalTrials.gov/show/NCT03150836">https://ClinicalTrials.gov/show/NCT03150836</a> |
| Checkpoint inhibitor | Tremelimumab With Chemoembolization or Ablation for Liver Cancer                                                                                                                    | Y |   | <a href="https://ClinicalTrials.gov/show/NCT01853618">https://ClinicalTrials.gov/show/NCT01853618</a> |
| Checkpoint inhibitor | Durvalumab, an Anti-PDL1 Antibody, and Tremelimumab, an Anti-CTLA4 Antibody, and Chemoradiation Before Surgery for Esophageal Cancer                                                | Y |   | <a href="https://ClinicalTrials.gov/show/NCT02962063">https://ClinicalTrials.gov/show/NCT02962063</a> |
| Checkpoint inhibitor | Durvalumab, an Anti-PDL1 Antibody, and Tremelimumab, an Anti-CTLA4 Antibody, and Chemoradiation Before Surgery for Esophageal Cancer                                                |   | Y | <a href="https://ClinicalTrials.gov/show/NCT02962063">https://ClinicalTrials.gov/show/NCT02962063</a> |
| Checkpoint inhibitor | Abatacept, Ixazomib Citrate, and Dexamethasone in Treating Patients With Multiple Myeloma Resistant to Chemotherapy                                                                 | Y |   | <a href="https://ClinicalTrials.gov/show/NCT03457142">https://ClinicalTrials.gov/show/NCT03457142</a> |
| Checkpoint inhibitor | Study of Immunotherapy Combined With Chemotherapy in Locally Advanced and Metastatic Pancreatic Cancer                                                                              | Y |   | <a href="https://ClinicalTrials.gov/show/NCT04324307">https://ClinicalTrials.gov/show/NCT04324307</a> |
| Checkpoint inhibitor | Nivolumab and Ipilimumab in Combination With Immunogenic Chemotherapy for Patients With Advanced NSCLC                                                                              | Y |   | <a href="https://ClinicalTrials.gov/show/NCT04043195">https://ClinicalTrials.gov/show/NCT04043195</a> |
| Checkpoint inhibitor | Study of Immune Checkpoint Inhibition With Radiation Therapy in Unresectable, Non-metastatic Pancreatic Cancer                                                                      |   | Y | <a href="https://ClinicalTrials.gov/show/NCT02868632">https://ClinicalTrials.gov/show/NCT02868632</a> |
| Checkpoint inhibitor | Ipilimumab, Nivolumab, and Radiation Therapy in Treating Patients With HPV Positive Advanced Oropharyngeal Squamous Cell Carcinoma                                                  |   | Y | <a href="https://ClinicalTrials.gov/show/NCT03799445">https://ClinicalTrials.gov/show/NCT03799445</a> |
| Checkpoint inhibitor | The Addition of Ipilimumab to Carboplatin and Etoposide Chemotherapy for Extensive Stage Small Cell Lung Cancer                                                                     | Y |   | <a href="https://ClinicalTrials.gov/show/NCT01331525">https://ClinicalTrials.gov/show/NCT01331525</a> |
| Checkpoint inhibitor | Immune Checkpoint Inhibition (Tremelimumab and/or MED4736) in Combination With Radiation Therapy in Patients With Unresectable Pancreatic Cancer                                    |   | Y | <a href="https://ClinicalTrials.gov/show/NCT02311361">https://ClinicalTrials.gov/show/NCT02311361</a> |
| Checkpoint inhibitor | Phase I Study of Tremelimumab, Durvalumab, High-dose Chemotherapy, + Autologous Stem Cell Transplant                                                                                | Y |   | <a href="https://ClinicalTrials.gov/show/NCT02716805">https://ClinicalTrials.gov/show/NCT02716805</a> |
| Checkpoint inhibitor | Study of Anti-PD-L1 in Combination With Chemo(Radio)Therapy for Oesophageal Cancer                                                                                                  | Y |   | <a href="https://ClinicalTrials.gov/show/NCT02735239">https://ClinicalTrials.gov/show/NCT02735239</a> |
| Checkpoint inhibitor | Characterisation of TIM-3/Gal-9 Immune Checkpoints in Primary Central Nervous System Diffuse Large B Cell Lymphomas                                                                 | Y |   | <a href="https://ClinicalTrials.gov/show/NCT05133505">https://ClinicalTrials.gov/show/NCT05133505</a> |
| Checkpoint inhibitor | An Investigational Study of Immunotherapy Combinations With Chemotherapy in Patients With Gastric or Gastroesophageal Junction (GEJ) Cancers                                        | Y |   | <a href="https://ClinicalTrials.gov/show/NCT03662659">https://ClinicalTrials.gov/show/NCT03662659</a> |
| Checkpoint inhibitor | IMP321 (Eftilagimod Alpha) as Adjunctive to a Standard Chemotherapy Paclitaxel Metastatic Breast Carcinoma                                                                          | Y |   | <a href="https://ClinicalTrials.gov/show/NCT02614833">https://ClinicalTrials.gov/show/NCT02614833</a> |
| Adoptive T cell      | Treatment of Relapsed and/or Chemotherapy Refractory B-cell Malignancy by Tandem CAR T Cells Targeting CD19 and CD20                                                                | Y |   | <a href="https://ClinicalTrials.gov/show/NCT03097770">https://ClinicalTrials.gov/show/NCT03097770</a> |
| Adoptive T cell      | Study of Anti-CEA CAR-T + Chemotherapy VS Chemotherapy Alone in Patients With CEA+Pancreatic Cancer & Liver Metastases                                                              | Y |   | <a href="https://ClinicalTrials.gov/show/NCT04037241">https://ClinicalTrials.gov/show/NCT04037241</a> |
| Adoptive T cell      | alloSHRINK - Standard cChemotherapy Regimen and Immunotherapy With Allogeneic NKG2D-based CYAD-101 Chimeric Antigen Receptor T-cells                                                | Y |   | <a href="https://ClinicalTrials.gov/show/NCT03692429">https://ClinicalTrials.gov/show/NCT03692429</a> |
| Adoptive T cell      | Interleukin-7 and Chemokine (C-C Motif) Ligand 19-expressing CD19-CAR-T for Refractory/Relapsed B Cell Lymphoma.                                                                    | Y |   | <a href="https://ClinicalTrials.gov/show/NCT03929107">https://ClinicalTrials.gov/show/NCT03929107</a> |
| Adoptive T cell      | CS1-CAR T Therapy Following Chemotherapy in Treating Patients With Relapsed or Refractory CS1 Positive Multiple Myeloma                                                             | Y |   | <a href="https://ClinicalTrials.gov/show/NCT03710421">https://ClinicalTrials.gov/show/NCT03710421</a> |
| Adoptive T cell      | Pilot Study of Autologous Anti-CD22 Chimeric Antigen Receptor Redirected T Cells in Patients With Chemotherapy Resistant Or Refractory Acute Lymphoblastic Leukemia                 | Y |   | <a href="https://ClinicalTrials.gov/show/NCT02588456">https://ClinicalTrials.gov/show/NCT02588456</a> |
| Adoptive T cell      | Microbiome in Cancer Patients With High Dose Chemotherapy With Stem Cell Transplantation                                                                                            | Y |   | <a href="https://ClinicalTrials.gov/show/NCT04691284">https://ClinicalTrials.gov/show/NCT04691284</a> |
| Adoptive T cell      | Phase I Study of CD19-CAR-T2 Cells for Patients With Chemotherapy Resistant or Refractory CD19+ Acute Leukemia                                                                      | Y |   | <a href="https://ClinicalTrials.gov/show/NCT02822326">https://ClinicalTrials.gov/show/NCT02822326</a> |
| Adoptive T cell      | Genetically Engineered Lymphocyte Therapy in Treating Patients With Lymphoma That is Resistant or Refractory to Chemotherapy                                                        | Y |   | <a href="https://ClinicalTrials.gov/show/NCT01735604">https://ClinicalTrials.gov/show/NCT01735604</a> |
| Adoptive T cell      | Pilot Study of Anti-CD20-CAR-engineered T Cells in Patients With Chemotherapy Resistant or Refractory CD20+ Lymphoma                                                                | Y |   | <a href="https://ClinicalTrials.gov/show/NCT02965157">https://ClinicalTrials.gov/show/NCT02965157</a> |
| Adoptive T cell      | Radiation Post-CAR T in Refractory Lymphoma                                                                                                                                         |   | Y | <a href="https://ClinicalTrials.gov/show/NCT04473937">https://ClinicalTrials.gov/show/NCT04473937</a> |
| Adoptive T cell      | Phase II Study of Salvage Radiation Treatment After B-cell Maturation Antigen Chimeric Antigen Receptor T-cell Therapy for Relapsed Refractory Multiple Myeloma                     |   | Y | <a href="https://ClinicalTrials.gov/show/NCT05336383">https://ClinicalTrials.gov/show/NCT05336383</a> |
| Adoptive T cell      | Outcomes After Chimeric Antigen Receptor Therapy and Radiation Therapy for Hematologic Malignancies                                                                                 |   | Y | <a href="https://ClinicalTrials.gov/show/NCT04888338">https://ClinicalTrials.gov/show/NCT04888338</a> |
| Adoptive T cell      | Modified T Cells, Chemotherapy, and Aldesleukin With or Without LV305 and CMB305 in Treating Participants With Advanced or Recurrent Sarcoma                                        | Y |   | <a href="https://ClinicalTrials.gov/show/NCT03450122">https://ClinicalTrials.gov/show/NCT03450122</a> |
| Adoptive T cell      | Stem Cell Transplant, Chemotherapy, and Biological Therapy in Treating Patients With High-Risk or Refractory Multiple Myeloma                                                       | Y |   | <a href="https://ClinicalTrials.gov/show/NCT00499577">https://ClinicalTrials.gov/show/NCT00499577</a> |
| Adoptive T cell      | Chemotherapy, Total-Body Irradiation, Donor Natural Killer Cell Infusion, Aldesleukin, and UCB Transplant in Treating Patients With Relapsed or Refractory AML                      | Y |   | <a href="https://ClinicalTrials.gov/show/NCT00871689">https://ClinicalTrials.gov/show/NCT00871689</a> |
| Adoptive T cell      | Chemotherapy and Peripheral Stem Cell Transplantation in Treating Patients With Metastatic Melanoma                                                                                 | Y |   | <a href="https://ClinicalTrials.gov/show/NCT00003552">https://ClinicalTrials.gov/show/NCT00003552</a> |
| Adoptive T cell      | Localized Radiation Therapy or Recombinant Interferon Beta and Avelumab With or Without Cellular Adoptive Immunotherapy in Treating Patients With Metastatic Merkel Cell Carcinoma  |   | Y | <a href="https://ClinicalTrials.gov/show/NCT02584829">https://ClinicalTrials.gov/show/NCT02584829</a> |
| Adoptive T cell      | Chemotherapy, Total-Body Irradiation, Donor Natural Killer Cell Infusion, Aldesleukin, and UCB Transplant in Treating Patients With Relapsed or Refractory AML                      |   | Y | <a href="https://ClinicalTrials.gov/show/NCT00871689">https://ClinicalTrials.gov/show/NCT00871689</a> |
| Adoptive T cell      | Irradiation-based Myeloablative Conditioning Followed by Treg/Tcon Immunotherapy in HSCT                                                                                            |   | Y | <a href="https://ClinicalTrials.gov/show/NCT03977103">https://ClinicalTrials.gov/show/NCT03977103</a> |
